# Supplementary material
Source: PubMed Central journal article supplement (PMC4643364)
Supplement: NIHMS725533-supplement-1.pdf [file NIHMS725533-supplement-1.pdf]

# SUPPLEMENTARY DATA

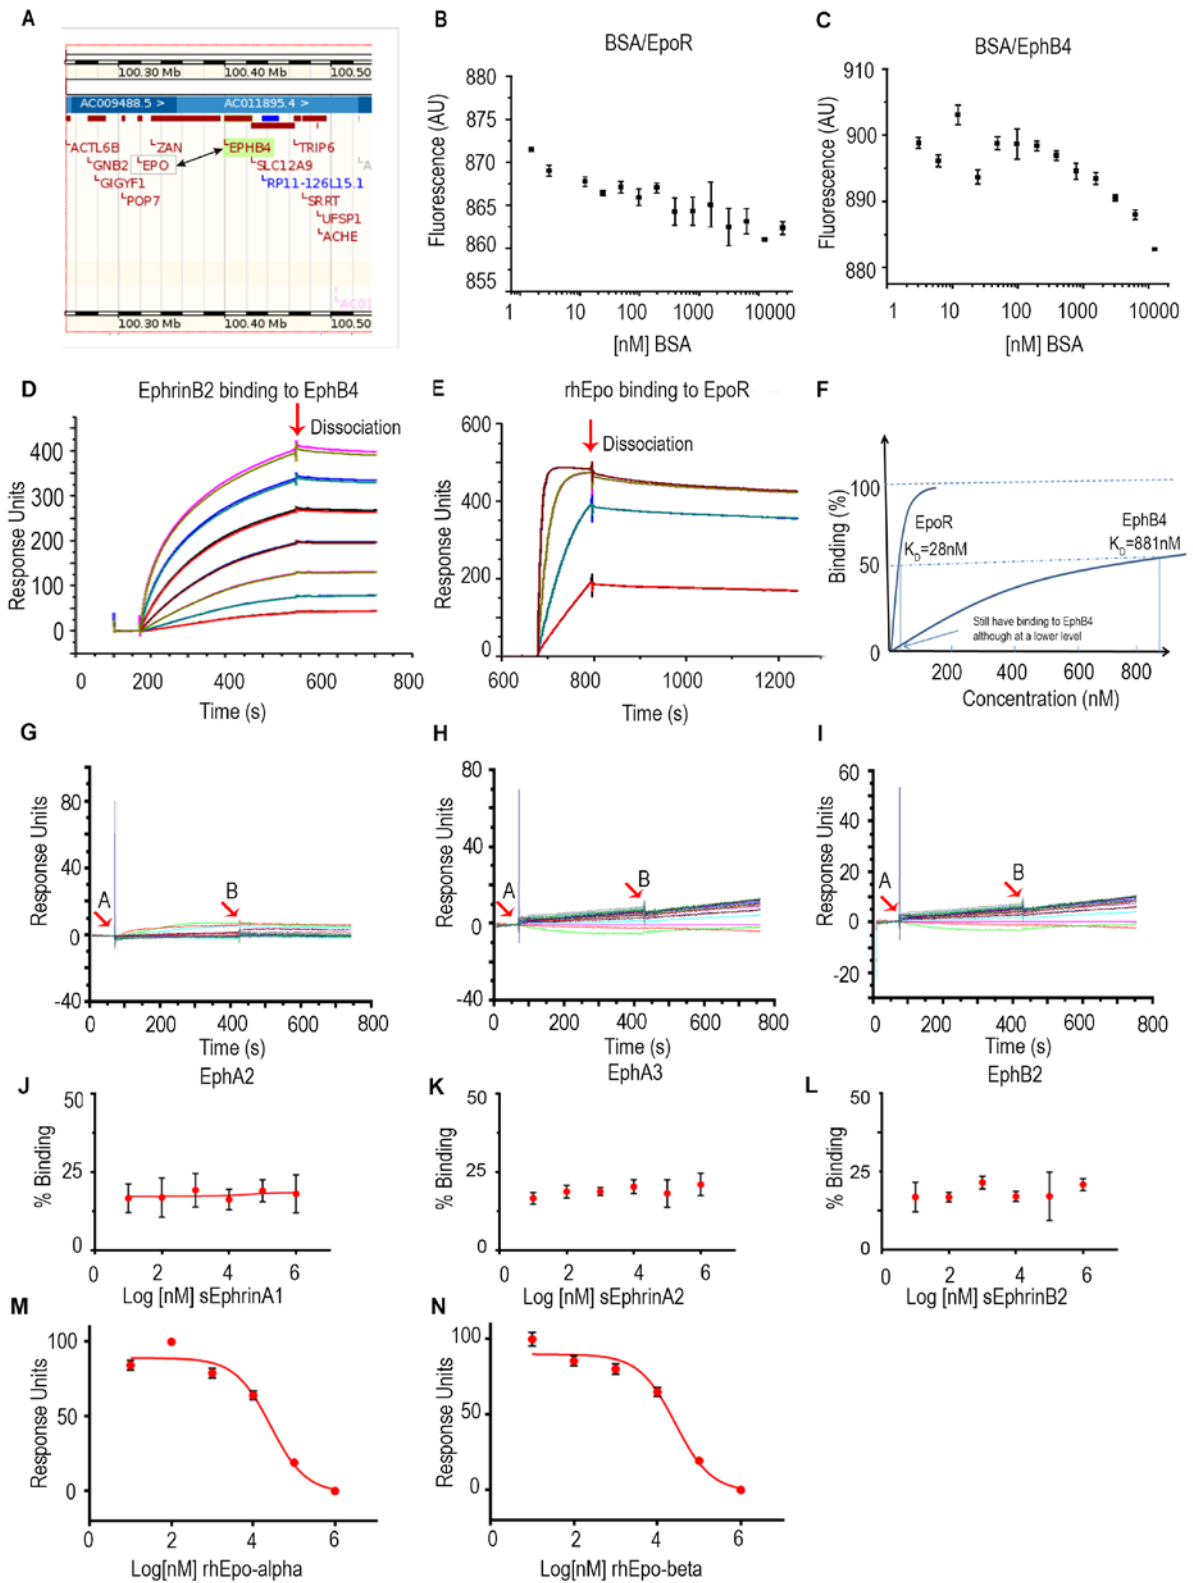

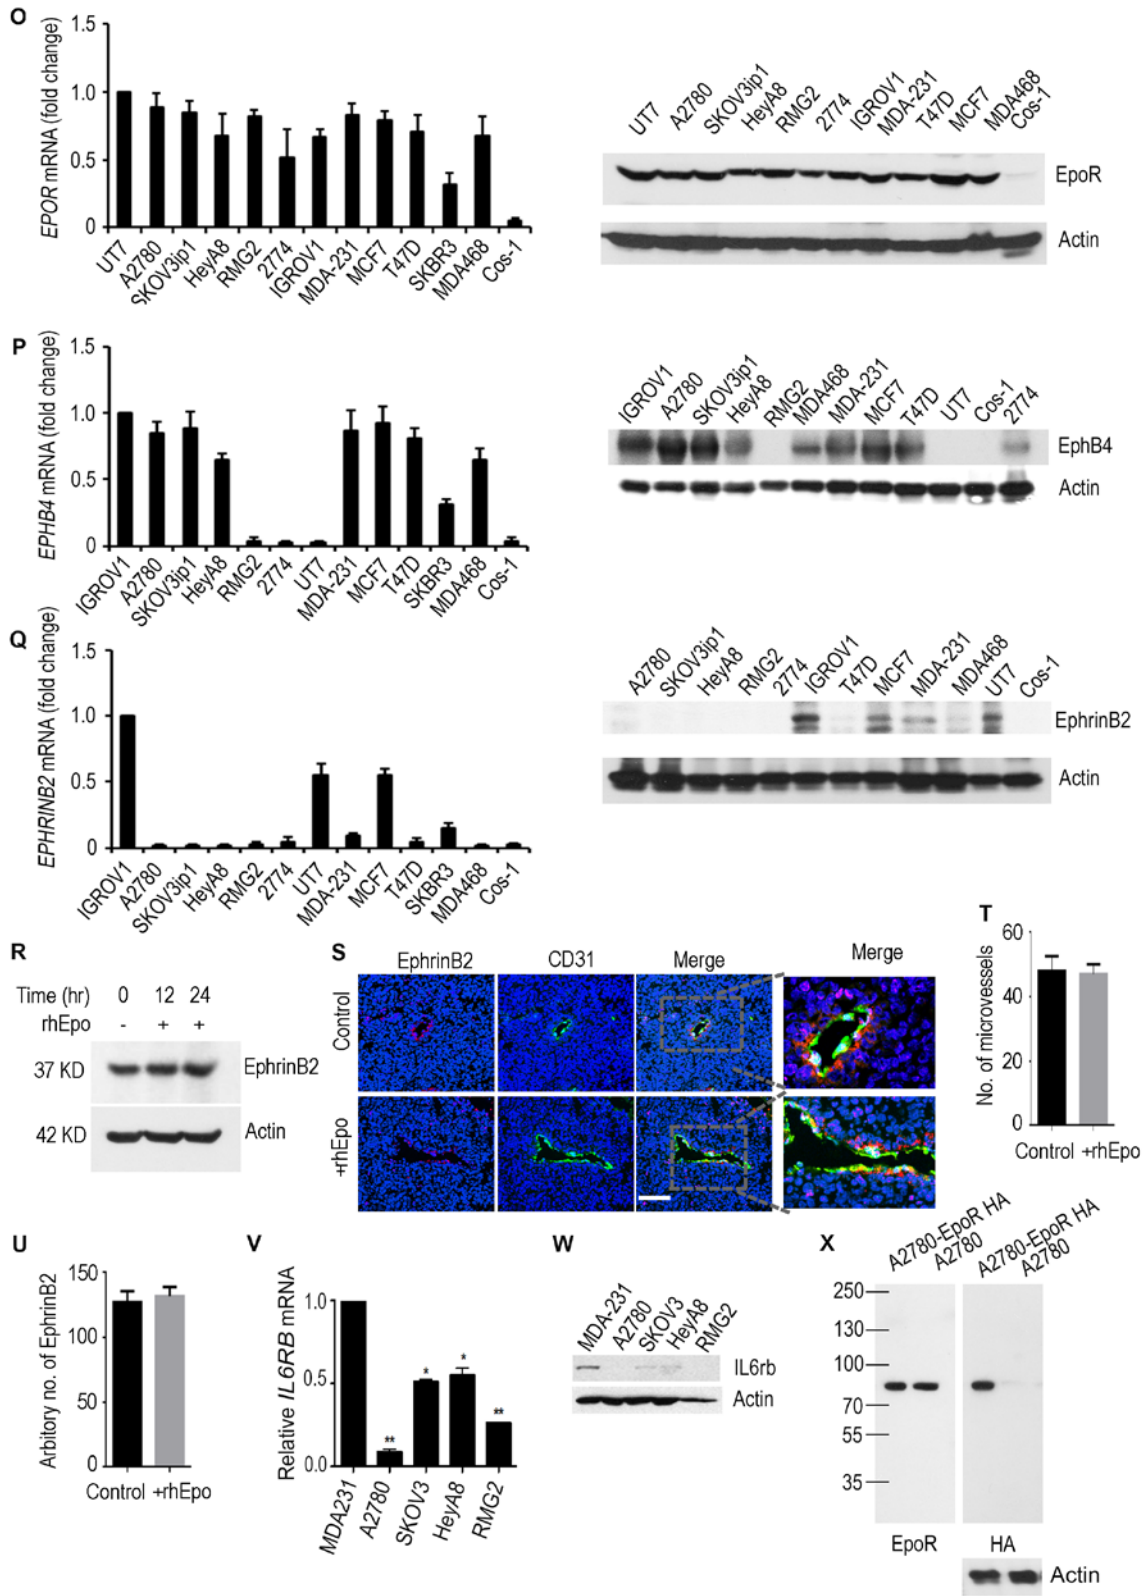

## **Figure S1, related to Figure 1. Evaluation of Epo or EphrinB2 binding to EphB4**

(A) Genomic co-localization of the *EPHB4* and *EPO* loci. (B and C) Fluorescence microscale thermophoresis (MST) analysis of BSA controls. (D) Surface Plasmon Resonance (SPR) evaluation of rhEpo or EphrinB2 binding to EphB4. Association and dissociation kinetics of EphrinB2 using the BIAcore instrument. Serial dilutions of peptide from 0.6 nM and 40 nM were injected onto an EphB4-immobilized carboxymethyl dextran biosensor chip. Bound protein is shown as response units (RU) as a function of time. Samples and a buffer blank were injected in duplicate. (E) Binding between Epo and EpoR. Raw sensorgram data for Epo binding to EpoR-Fc on BIAcore. Shown is an overlay of 8 sensorgrams (four concentrations of Epo in range of 13.4 nM to 107 nM in duplicate). EpoR-Fc was captured to sensor chip by mouse anti-human IgG (Fc) antibody. Epo was injected to both control flow cell and EpoR-coated cell, followed by washing with running buffer for 5 min. (F) A hypothetical schematic illustrating the relationship between binding level and ligand concentration. A ligand with low binding affinity may still be able to bind to its corresponding receptor and exert biological functions. Binding Sensorgram of concentration series of rhEpo (0.007-4 µg/mL) to EphA2 (G) EphA3 (H) EphB2 (I) on CM-5 chip. Arrow A represents starting point of sample injection or the beginning of association phase. Arrow B represents the end of sample injection or the beginning of dissociation phase. Competitive binding assays evaluating the binding of EphA2 to EphrinA1 (J), EphA3 to EphrinA2 (K), and EphB2 to EphrinB2 (L) in the presence of rhEpo. Competitive binding assays evaluating rhEpo-alpha (M) and rhEpo-beta (N) binding to EphB4. Western blot and qRT-PCR analysis of (O) EpoR (P) EphB4, and (Q) EphrinB2 expression in ovarian and breast

cancer cell lines and UT7 cells. (R) Western blot analysis of EphrinB2 in endothelial cells. (S) Immunofluorescence staining of EphrinB2 and CD31 in tumors with or without rhEpo (50 IU). Quantification of microvessels (T) and EphrinB2 expression (U) in tumors. (V) qRT-PCR analysis and (W) Western blot analyses of IL6rb in ovarian and breast cancer cell lines. (X) Western blot analysis of ectopically expressed HA tagged EpoR in A2780 cells using HA antibody. Scale bar represents 50  $\mu$ m. Mean  $\pm$  SEM values are shown. \* $p < 0.05$ ; \*\* $p < 0.01$ . n=3.

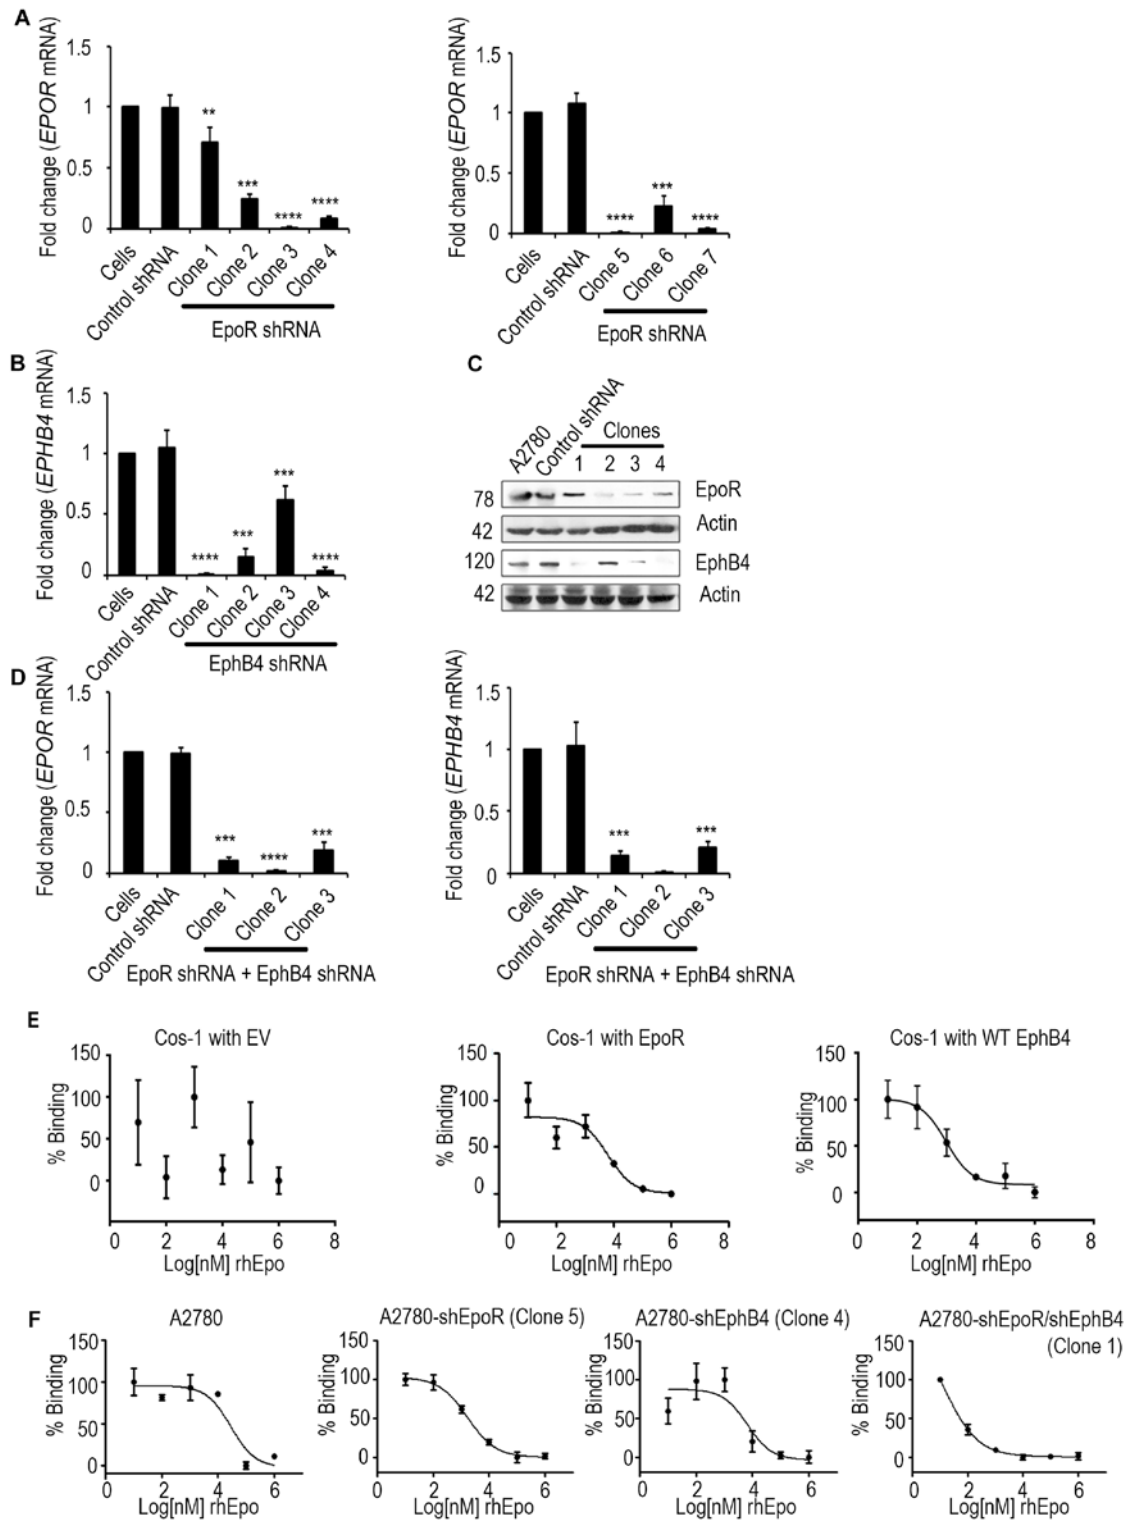

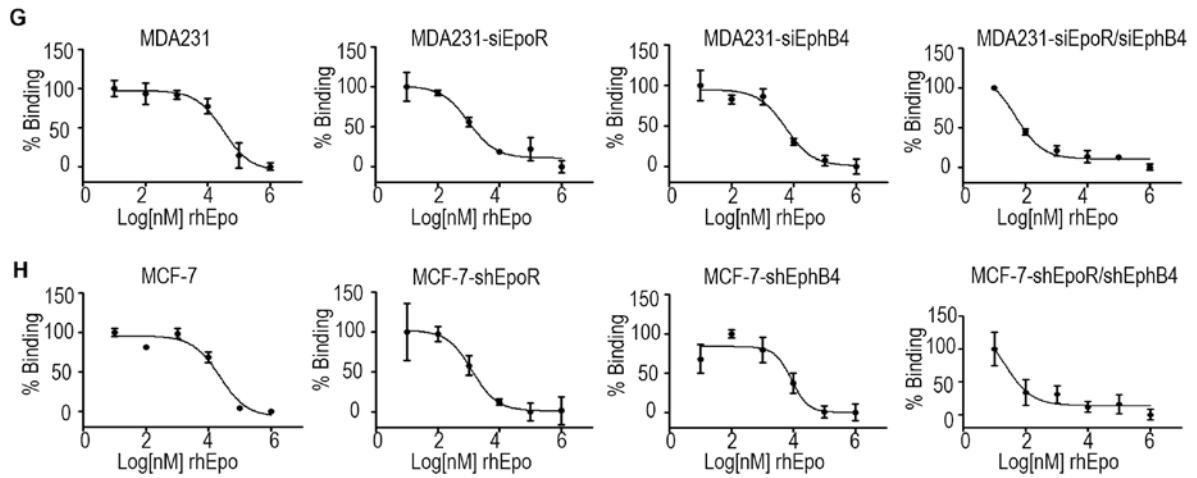

**I**

MELRVLLCWASLAAALEETLLNTKLETADLKWVTFPQVDGQW **EELSGLDDEEQHSVRTY**EV  
 CDVQRAPGQAHWLR TGWVPRRGAVHVYATLRFTMLECLSLPRAGRSCKETFTTFVYIESDA  
 DTATALTPAWMENPYIKVDTVA AEHLTRKRP GAEATGKVNKTLRLGPLSKAGFYLA FQD  
 QGACMALLSLHLFYKKAQLTVNLTRFPETVPRELVVPVAGSCVDAVPAPGPPSPSLYCR  
 EDGQWAEQPV TGCSCAPGF EAAEGNTKCRACAQGT FKLPSGEGSCQPCPANSHSNTIGSA  
 VCQCRVGYFRARTDPRGAPCTTPPSAPRSVVSRLNGSSLHLEWSAPLES GGREDLYALR  
 CRECRPGGSCAPCGDLTFDPGPRDLVEPWWVVRGLRPDFTYTFEVTALNGVSSLATGPV  
 PFEPVNVTTDREVPPAVSDIRVTRSSPSSLSLAWAVPRAPSGAVLDYEVKYHEKGAEGPS  
 SVRFLKTSENRAELRGLKRGASYLVQVRARSEAGY GPFQGEHHSQTQLDESEGWREQLAL

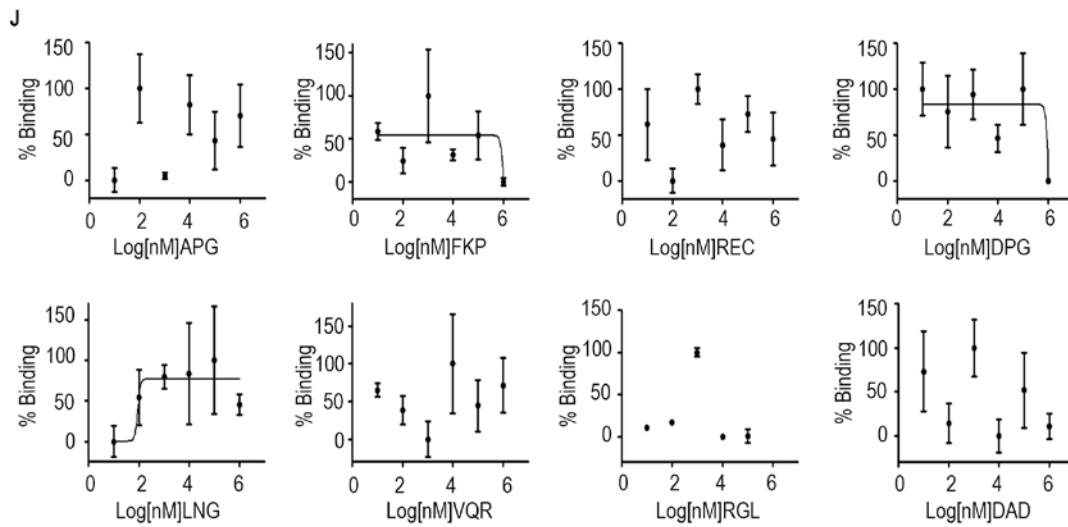

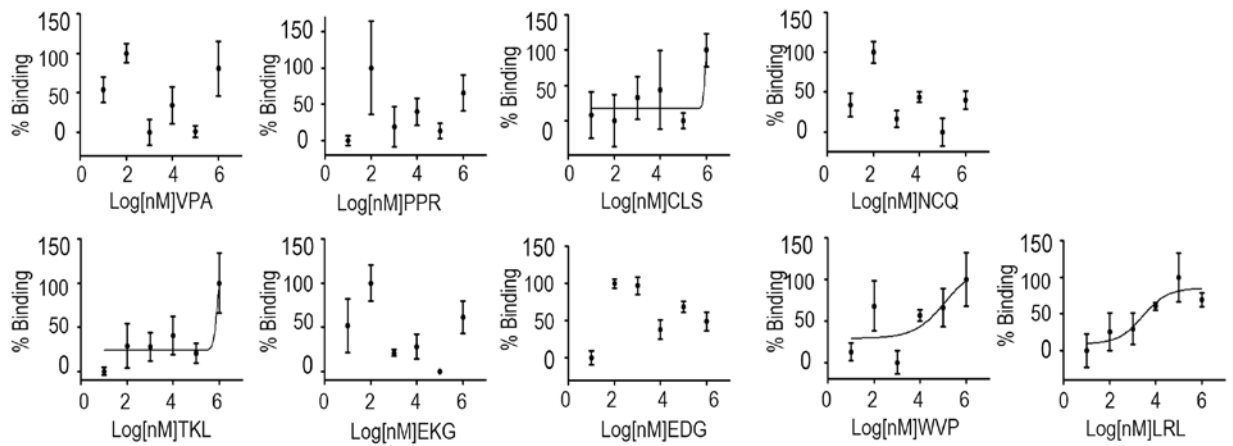

**K** Cos-1 with mutated EphB4 (Ser46)      Cos-1 with mutated EphB4 (Leu48)

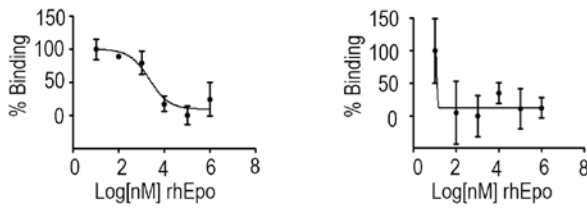

**L** Cos-1 with mutated EphB4 (Glu50)      Cos-1 with mutated EphB4 (Glu44)      Cos-1 with mutated EphB4 (Tyr58)

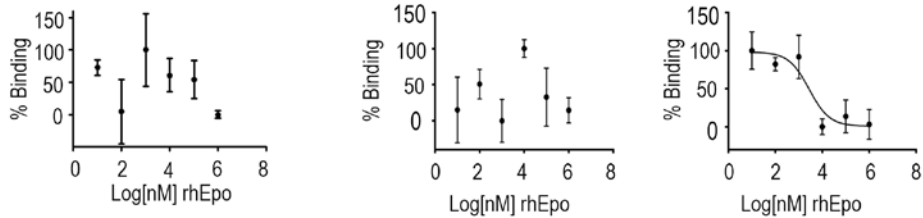

**M** A2780-shEphB4      A2780-shEphB4      A2780-shEphB4

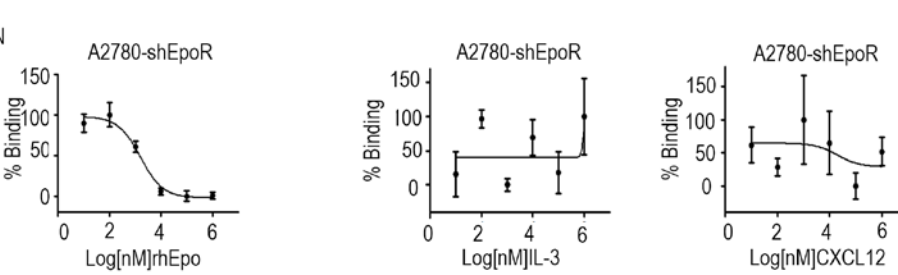

**N** A2780-shEpoR      A2780-shEpoR      A2780-shEpoR

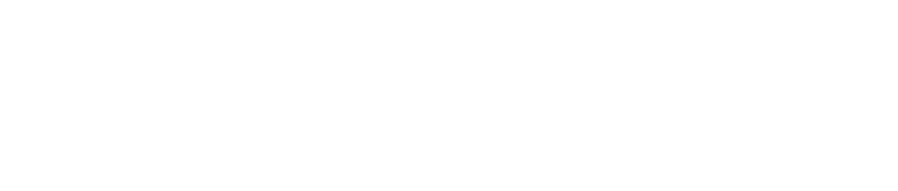

**Figure S2, related to Figure 2. Characterization of rhEpo binding to ovarian and breast cancer cells**

(A) Real-time RT-PCR analysis of *EPOR* expression in A2780-shEpoR cells. (B) Real-time RT-PCR analysis of *EphB4* expression in A2780-shEphB4 cells. (C) Western blot analyses of EpoR and EphB4 expression in A2780-shEpoR and -shEphB4 cells (numbers on the left represent molecular weights). (D) Real-time RT-PCR analysis of *EPOR* and *EPHB4* expression in A2780 cells transfected with shEpoR and shEphB4. (E) Binding of [<sup>125</sup>I]rhEpo to Cos-1 cells transfected with empty vector, EpoR, or EphB4. (F) Binding of [<sup>125</sup>I]rhEpo to A2780-shEpoR (clone 5), A2780-shEphB4 (clone 4), and A2780-shEpoR/shEphB4 (clone 2). (G) Binding of [<sup>125</sup>I]rhEpo to MDA-MB231, MDA-MB231-siEpoR, MDA-MB231-siEphB4, and MDA-MB231-siEpoR/siEphB4. (H) Binding of [<sup>125</sup>I]rhEpo to MCF-7, MCF-7-shEpoR, MCF-7-shEphB4, and MCF-7-shEpoR/shEphB4. (I) Localization of the competitive peptides within the extracellular domain of EphB4. (J) Competitive binding assays between [<sup>125</sup>I]rhEpo and different peptides in A2780-shEpoR cells. (K) Binding of [<sup>125</sup>I]rhEpo to Cos-1 cells transfected with mutant EphB4 (Ser46, or Leu 48) at EphrinB2-EphB4 binding domain. (L) Binding of [<sup>125</sup>I]rhEpo to Cos-1 cells transfected with mutant EphB4 (Glu50, Glu44 or Tyr58) at EphrinB2-EphB4 binding domain. (M) Competitive binding between [<sup>125</sup>I]rhEpo and soluble EphrinB2, soluble EpoR, or soluble EphrinB2 in A2780-shEphB4 cells. (N) Competitive binding between [<sup>125</sup>I]rhEpo and rhEpo, IL3, or CXCL12. Mean ± SEM values are shown. \*\*p < 0.01, \*\*\*p < 0.001, \*\*\*\*p < 0.0001. n=3.



Table S1, related to Figure 2. EphB4 mutation in EEL domain

| EphB4 mutation on EEL domain  |                                                                                                                        |
|-------------------------------|------------------------------------------------------------------------------------------------------------------------|
| <b>EEL</b>                    | GAG GAA CTG AGC GGC CTG GAT GAG GAA CAG CAC AGC GTG CGC ACC<br>TAC<br>E E L S G L D E E Q H S V R T<br>Y               |
| <b>Glu-44</b> → <b>Ser-44</b> | GAG <u>TCG</u> CTG AGC GGC CTG GAT GAG GAA CAG CAC AGC GTG CGC ACC<br>TAC<br>E <u>S</u> L S G L D E E Q H S V R T<br>Y |
| <b>Ser-46</b> → <b>Ala-46</b> | GAG GAA CTG <u>GCC</u> GGC CTG GAT GAG GAA CAG CAC AGC GTG CGC ACC<br>TAC<br>E E L <u>A</u> G L D E E Q H S V R T<br>Y |
| <b>Leu-48</b> → <b>Tyr-48</b> | GAG GAA CTG AGC GGC <u>TAC</u> GAT GAG GAA CAG CAC AGC GTG CGC ACC<br>TAC<br>E E L S G <u>Y</u> D E E Q H S V R T<br>Y |
| <b>Glu-50</b> → <b>Ser-50</b> | GAG GAA CTG AGC GGC TAC GAT <u>TCG</u> GAA CAG CAC AGC GTG CGC ACC<br>TAC<br>E E L S G L D <u>S</u> E Q H S V R T<br>Y |
| <b>Tyr-58</b> → <b>Leu-58</b> | GAG GAA CTG AGC GGC CTG GAT GAG GAA CAG CAC AGC GTG CGC ACC<br><u>CTG</u><br>E E L S G L D E E Q H S V R T<br><u>L</u> |

**Table S2, related to Figure 2. Raw data of binding assay**

Provided as a separate Excel file

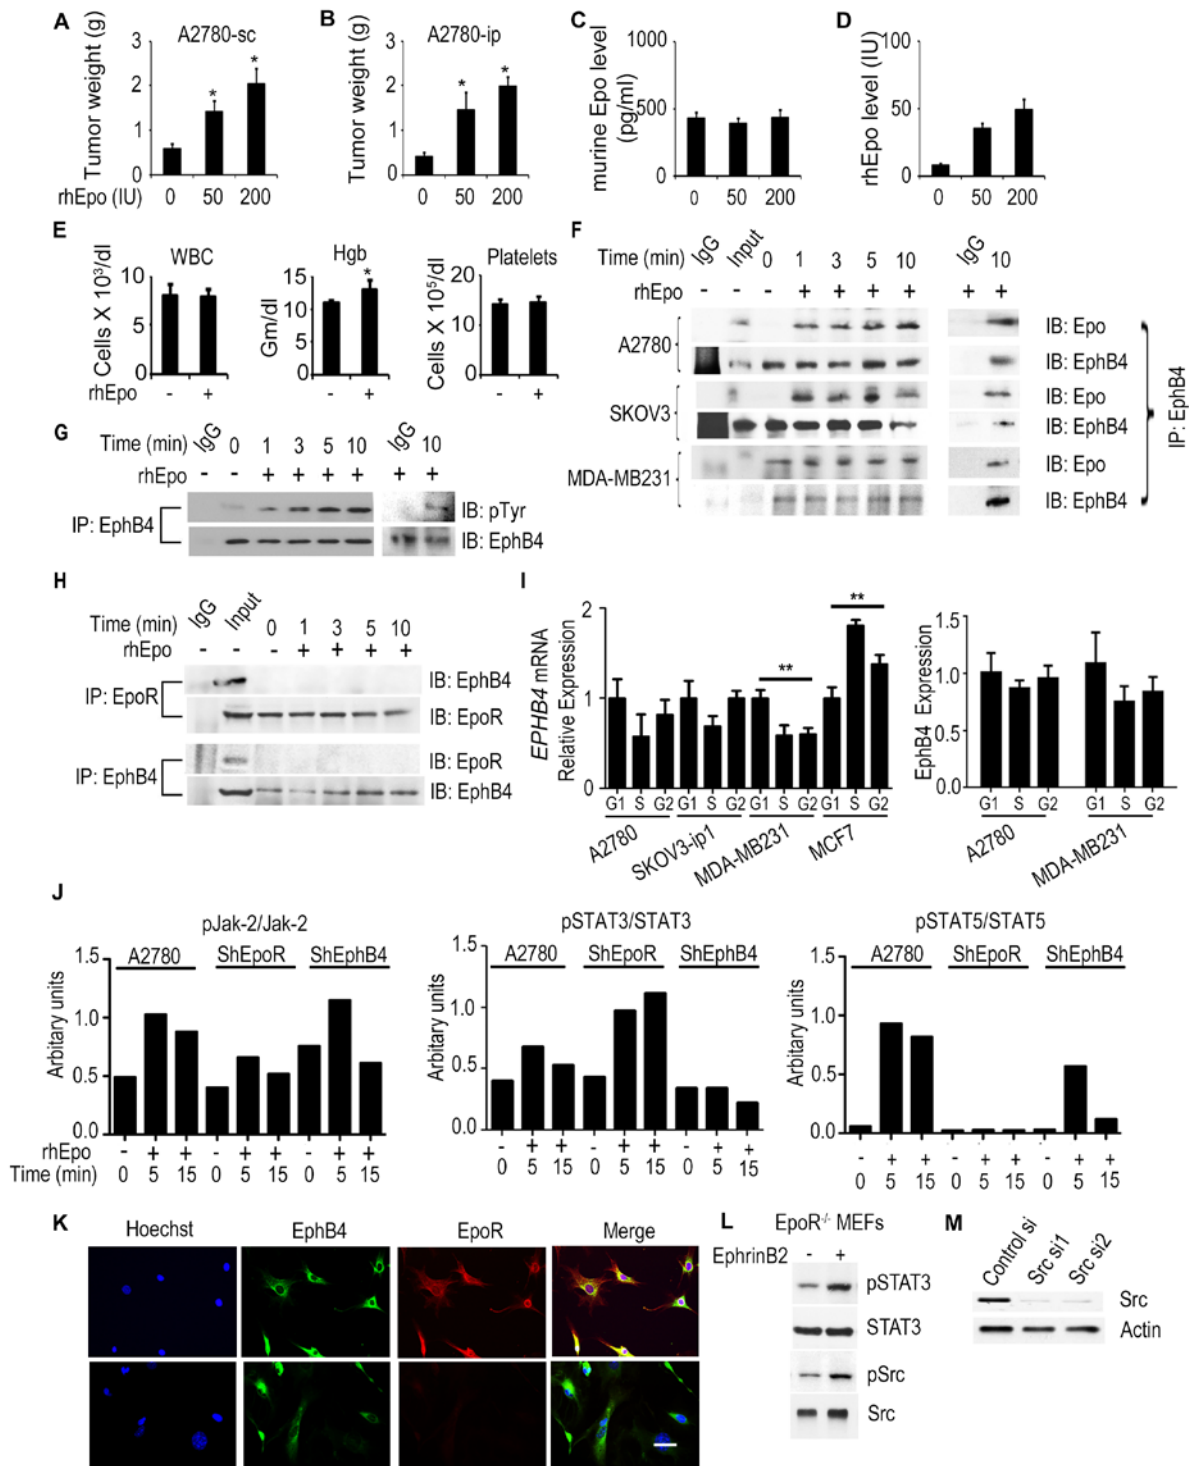

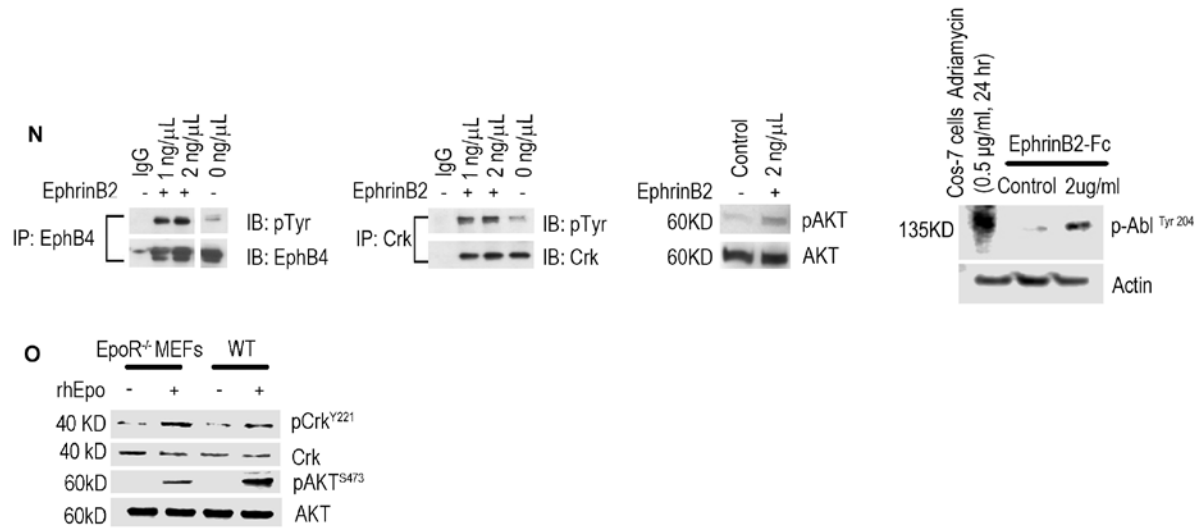

**Figure S3, related to Figure 3. Characterization of rhEpo-mediated activation of EphB4**

Effect of rhEpo dose on the growth of A2780 tumors injected into the subcutaneous space (A, A2780-sc) or into the peritoneal cavity of nude mice (B, A2780-ip); n=10, (C) murine Epo levels and (D) human Epo levels in tumors. (E) Evaluation of white blood cells (WBC), hemoglobin (Hgb), and platelets in mice bearing A2780 tumors treated with intraperitoneal (i.p.) rhEpo. The rhEpo treatment was given 3x/week for 3 weeks. (F) Interaction between rhEpo and EphB4 in ovarian (A2780 and SKOV3) and breast (MDA-MB231) cancer cell lines. (G) Activation of EphB4 by rhEpo in MDA-MB231 cells. (H) A2780 parental cells were stimulated with rhEpo (50 IU/mL) for indicated time points. Interaction between EpoR and EphB4 were analyzed by immunoprecipitation assay. (I) mRNA assessment of *EPHB4* expression in cancer cells (A2780, SKOV3-ip1, MDA-MB231, and MCF7) at different stages of cell cycle. A2780 and MDA-MB231 cells were labeled with EphB4 antibody and FACS sorted according to cell cycle. Dose of rhEpo used for both experiments was 50 IU/mL. (J) Densitometry image analysis of

pJak2, pSTAT5, and pSTAT3 levels in A2780, A2780-shEpoR, and -shEphB4 cells following rhEpo treatment (also see Figure 3b). (K) Immunofluorescence staining using EphB4 (green) and EpoR (red) antibody in EpoR<sup>-/-</sup> MEFs. Scale bar represents 50  $\mu$ m. (L) Western blot analysis for STAT3 following rhEpo stimulation in EpoR<sup>-/-</sup> MEFs. (M) Western blot analysis for Src following siSrc transfection in A2780 cells. (N) Effect of EphrinB2 on EphB4, Crk, Akt, and Abl activation along with positive control. (O) Effect of rhEpo on Crk and Akt activation in EpoR<sup>-/-</sup>MEFs. Mean  $\pm$  SEM values are shown. \*p < 0.05; \*\*p < 0.01.

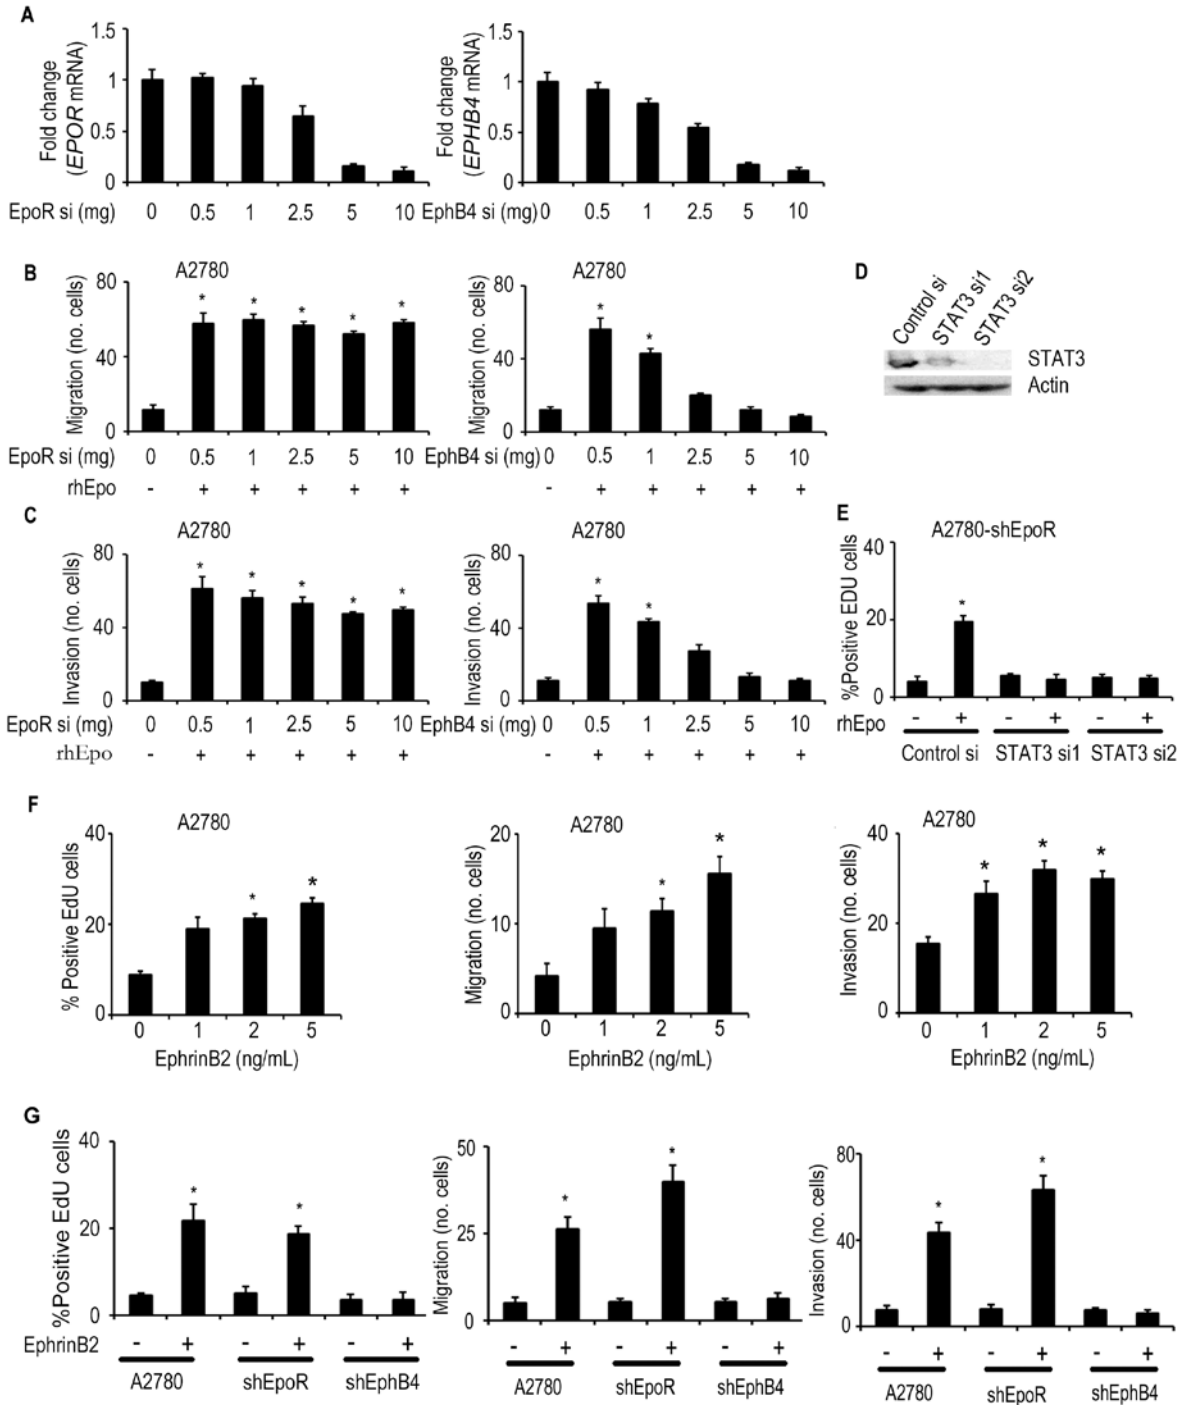

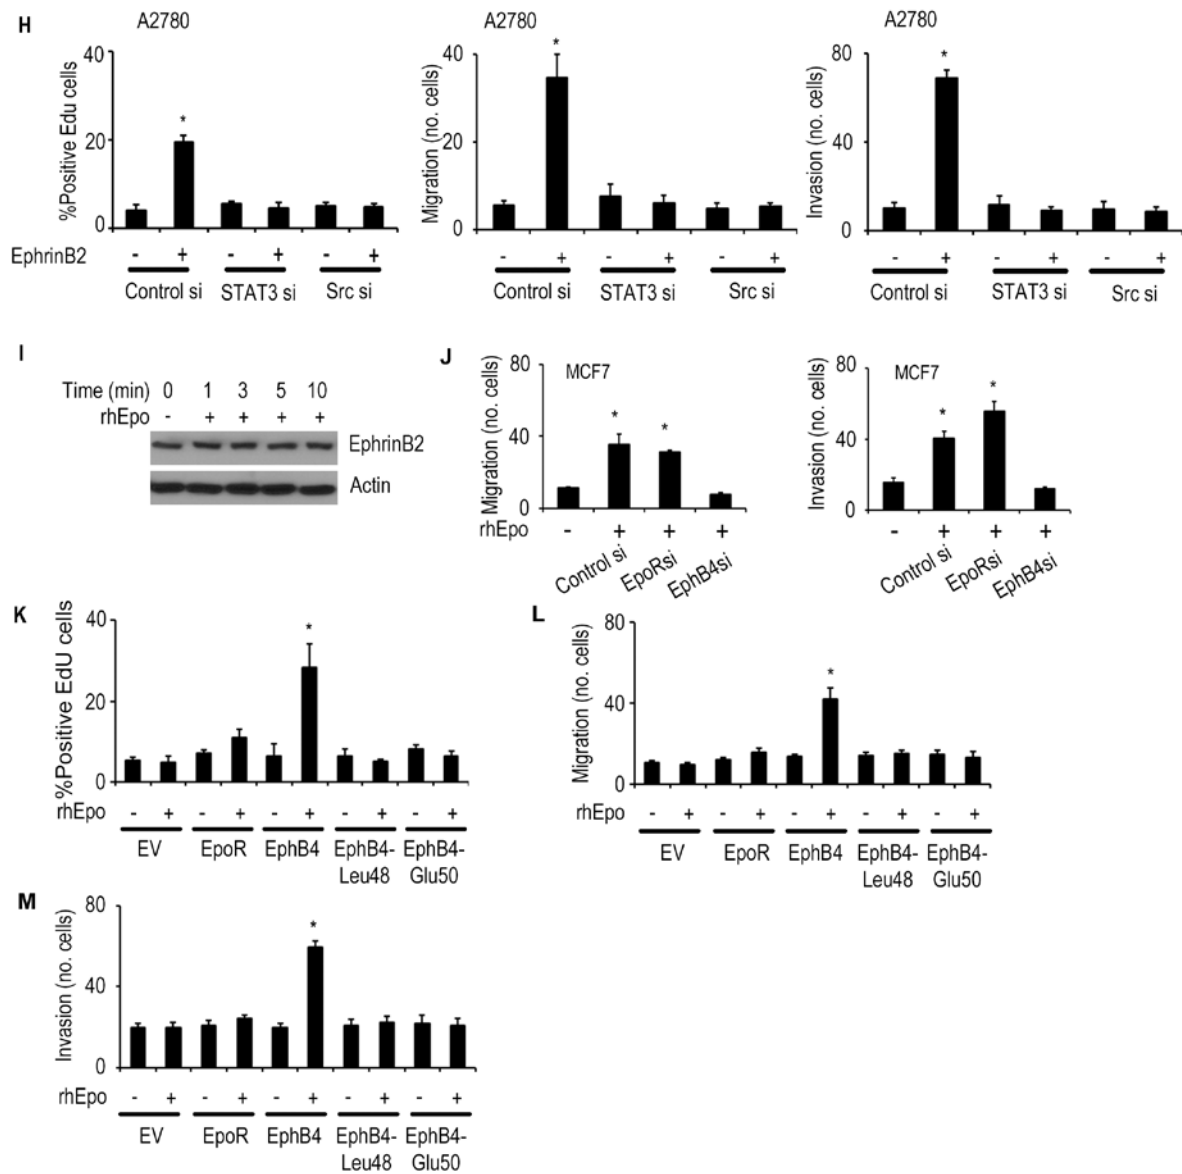

**Figure S4, related to Figure 4. rhEpo-mediated effects on cancer cells**

(A) Dose-dependent effects of *EPOR* or *EPHB4* siRNA on mRNA levels of respective genes in A2780 cells. (B-C) Dose-dependent effects of EpoR or EphB4 siRNA on migration and invasion of A2780 cells in the presence or absence of rhEpo. (D) Western blot analysis of STAT3 following siSTAT3 transfection in A2780 cells. (E) Effect of STAT3 siRNA on proliferation of A2780 cells in the presence or absence of rhEpo. The

dose of rhEpo used for these experiments was 50 IU/mL. (F) Effect of EphrinB2 on proliferation, migration, and invasion of A2780 cells. (G) Proliferation, migration, and invasion of A2780 parental, -shEpoR, and -shEphB4 cells in the presence or absence of EphrinB2. (H) Effect of STAT3 or Src siRNA on proliferation, migration, and invasion of A2780 parental cells in the presence or absence of EphrinB2. (I) Effect of rhEpo on EphrinB2 expression levels in MDA-MB231 cells. (J) Effect of EpoR or EphB4 silencing on migration and invasion of MCF7 cells. (K) Proliferation, (L) migration, and (M) invasion of Cos-1 cells transfected with EphB4, EpoR or EphB4 mutant (Leu48 or Glu50). Mean  $\pm$  SEM values are shown. Mann-Whitney rank sum test \* $p < 0.001$ .



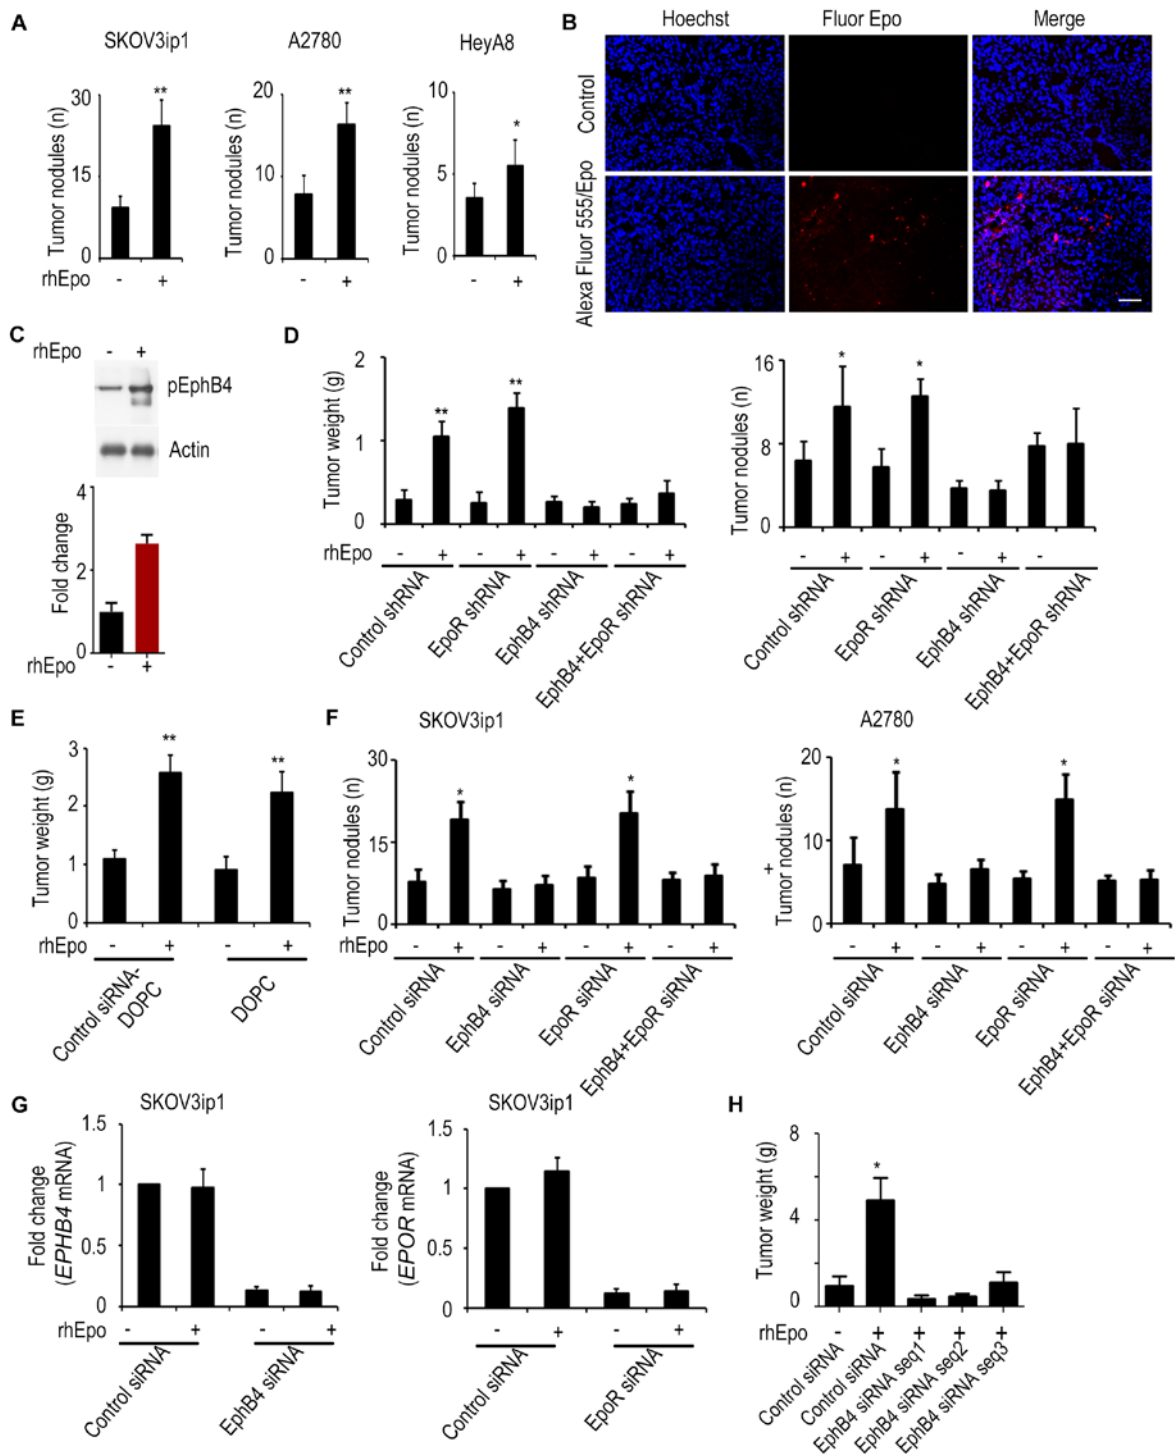

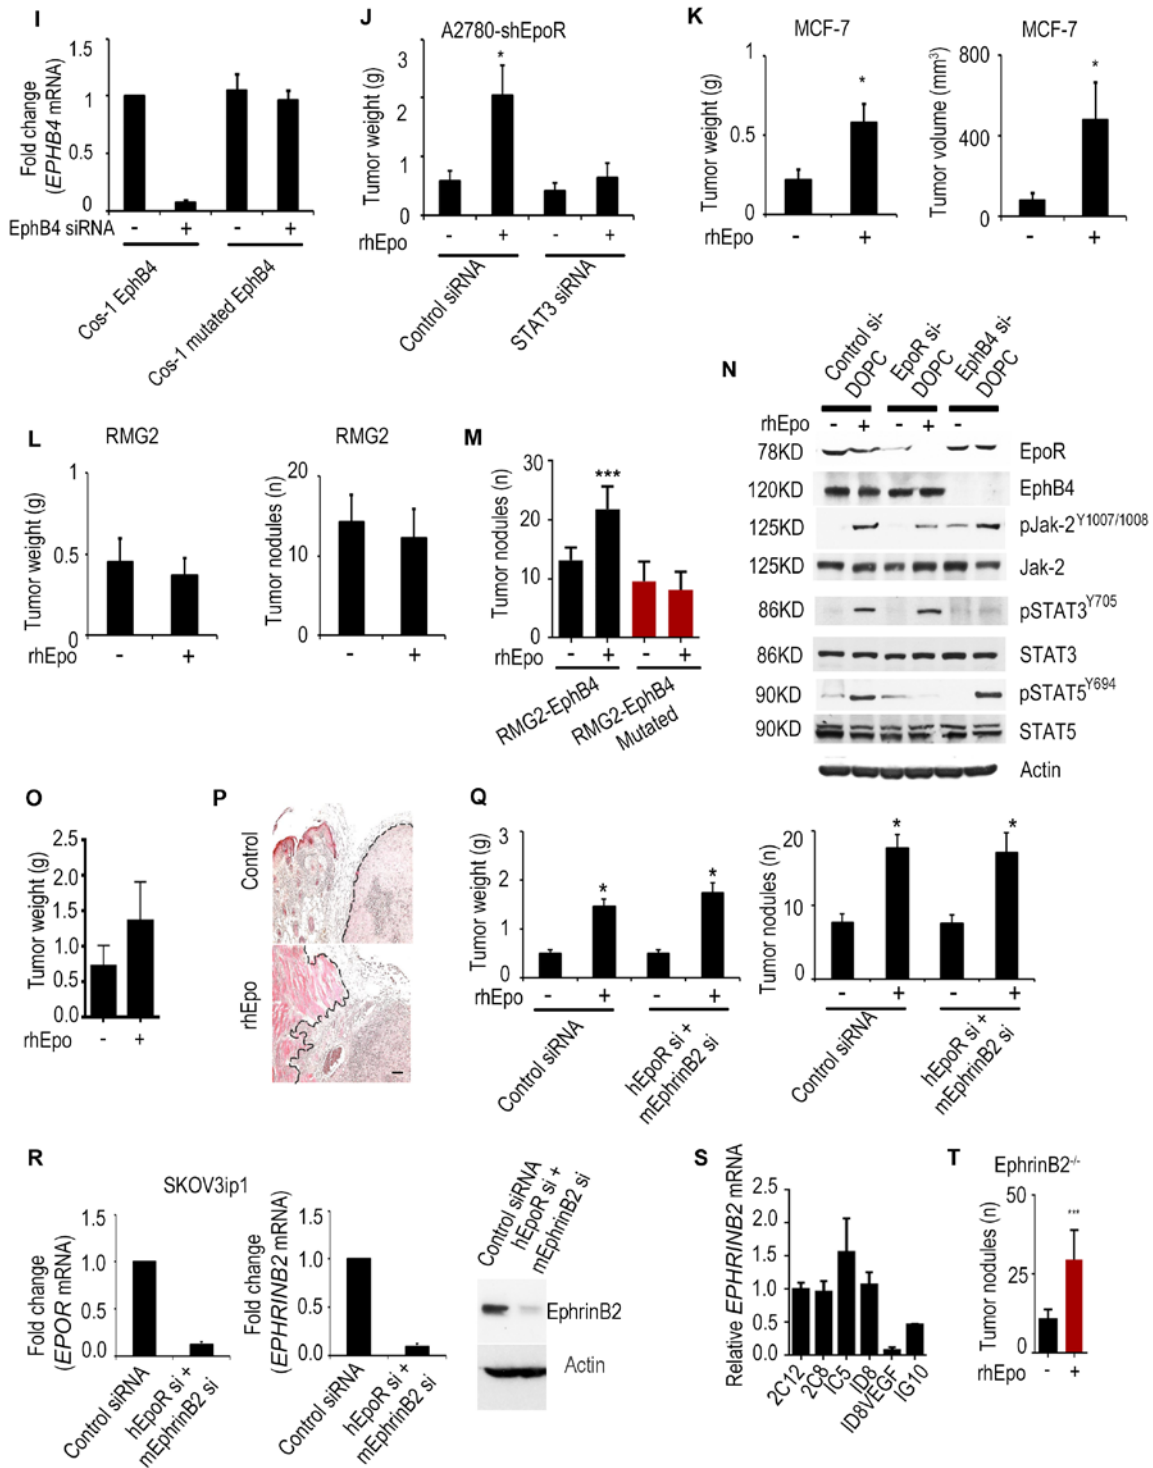

**Figure S5, related to Figure 5. *In vivo* EphB4 silencing blocks rhEpo-induced tumor growth**

(A) Effect of rhEpo on number of nodules in SKOV3ip1, A2780, and HeyA8 orthotopic mouse models. (B) Histological analysis of tumor following fluorescently labelled (Alexa Flour 555) rhEpo treatment. (C) Western blot of pEphB4 in tumors after rhEpo administration in mice bearing A2780 tumors. Adjacent graph shows the quantification pEphB4. (D) Seven days following injection of A2780-shControl, -shEphB4, -shEpoR, or -dual shEpoR + shEphB4 cells into the peritoneal cavity (n = 10 mice per group), mice were treated with either vehicle control or rhEpo (50 IU given 3x/week i.p.). A necropsy was performed after 5 weeks and aggregate tumor weight and number of nodules were assessed. (E) Effect of empty DOPC nanoliposomes or control siRNA-DOPC (150 µg/kg i.p. given twice weekly for 5 weeks) on A2780 tumor growth *in vivo* with or without rhEpo (50 IU given 3x/week i.p.). (F) Effect of control, EphB4, EpoR or EphB4 + EpoR siRNAs on tumor growth in the presence or absence of rhEpo in SKOV3ip1 or A2780 mice models. (G) Effect of EphB4 and EpoR siRNAs on *EPHB4* and *EPOR* mRNA levels, respectively, in the SKOV3ip1 model *in vivo*. (H) Evaluation of the effect of different siRNA sequences of EphB4 on the inhibition of rhEpo-induced tumor growth *in vivo*. A2780 tumor-bearing (peritoneal cavity) animals (n = 10 mice per group) were treated with either control siRNA or different EphB4 targeted siRNA sequences (150 µg/kg i.p. given twice weekly for 5 weeks) in DOPC nanoliposomes. The rhEpo was given at 50 IU given 3x/week i.p. A necropsy was performed to assess aggregate tumor weight at the end of the experiment. (I) *EPHB4* expression (qRT-PCR) following EphB4 siRNA treatment in Cos-1 cells transfected with either an EphB4 or mutated EphB4

construct. (J) Effect of control or STAT3 siRNAs on tumor growth in the presence or absence of rhEpo in A2780-shEpoR model. (K) Effect of rhEpo (50 IU given 3x/week i.p.) on tumor growth in the MCF-7 breast cancer mouse model. (L) Effect of rhEpo on RMG2 ovarian cancer model. (M) Number of tumor nodules following intraperitoneal injection of ectopically expressed EphB4 or the mutated form of EphB4 in RMG2 model. (N) Expression of EpoR or EphB4 downstream targets in tumors obtained from mice bearing A2780 tumors treated with control siRNA-DOPC, EpoR siRNA-DOPC, or EphB4 siRNA-DOPC with or without rhEpo (50 IU given 3x/week i.p.; n=10 mice per group). Tumor samples from each group were subjected to Western blot analyses for the proteins listed on the figure. (O) Tumor weight following rhEpo treatment. (P) H and E staining shows invasion of tumor cells into muscle layer. (Q) Mice bearing SKOV3ip1 (EphrinB2-negative) tumors were treated with either control or hEpoR + mEphrinB2 siRNAs incorporated in chitosan nanoparticles (150 µg/kg i.p. twice weekly). rhEpo was given at 50 IU given 3x/week i.p. (R) Effect of hEpoR and mEphrinB2 siRNAs on *EPOR* and *EPHRINB2* expression levels are shown. (S) Relative mRNA expression of *EPHRINB2* in murine cell lines. (T) Effect of rhEpo on number of ID8VEGF tumor nodules in EphrinB2<sup>-/-</sup> mice. Scale bar represents 50 µm. n=10, Mean ± SEM values are shown. \*p<0.05; \*\*p<0.001, \*\*\*p <0.001.

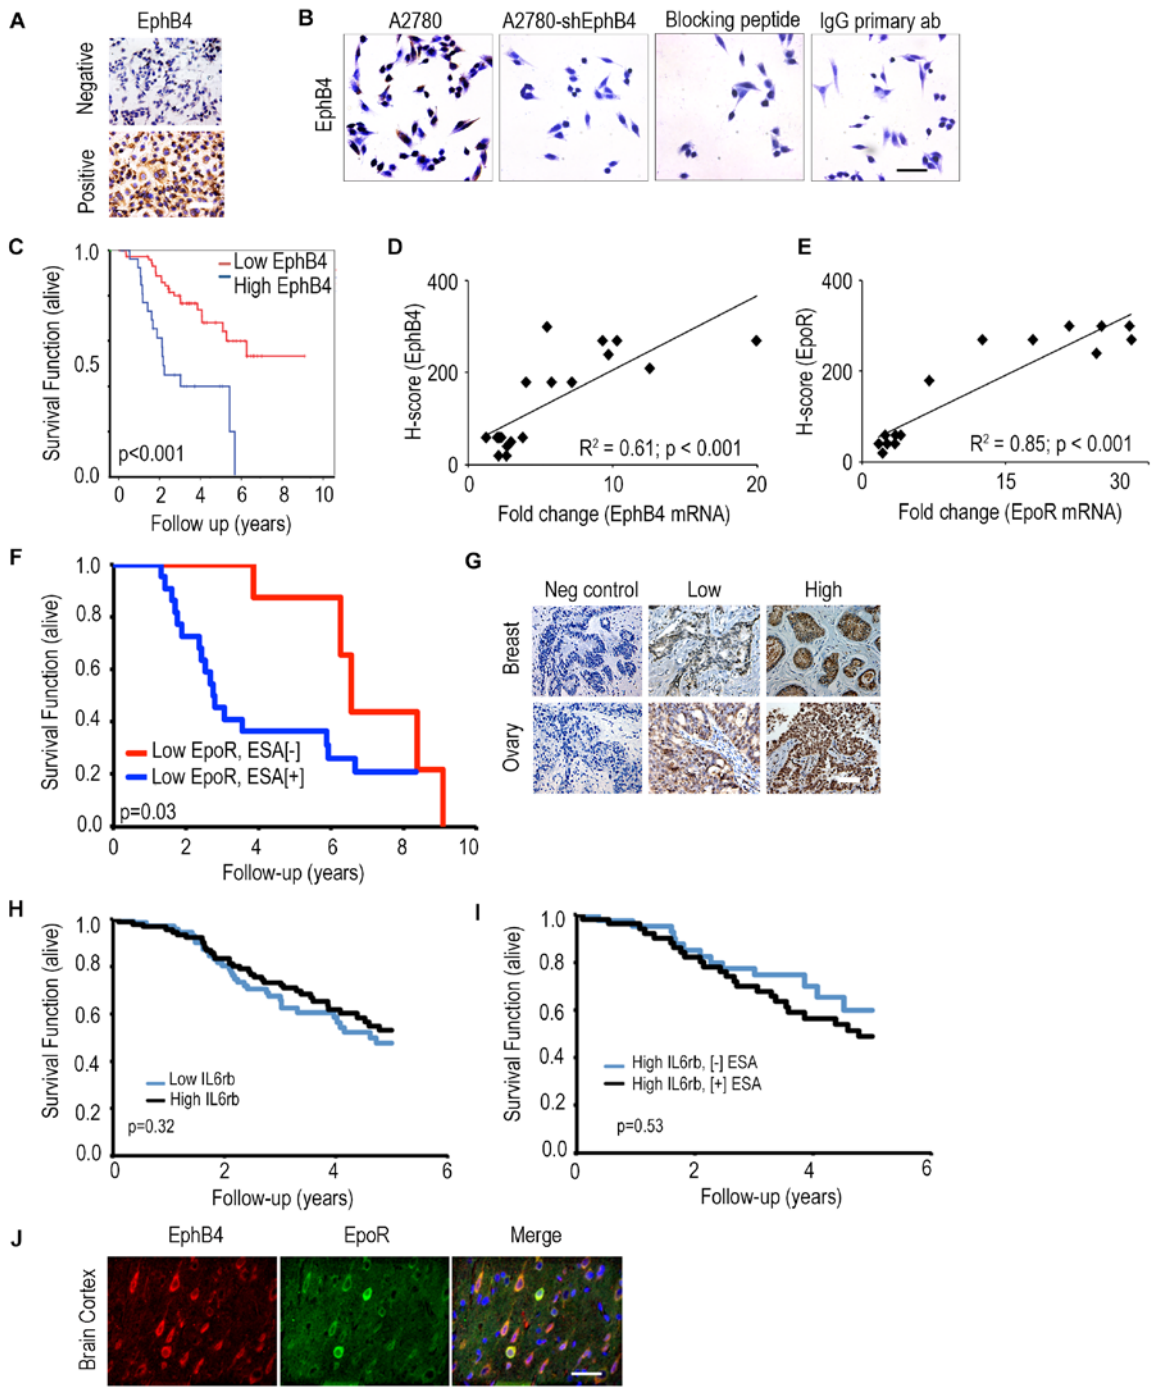

**Figure S6, related to Figure 6. Correlation of EphB4 and EpoR protein and mRNA expression**

(A) Immunohistochemical staining using EphB4 antibody in IGROV cells with or without EphB4 siRNA transfection. Scale bar represents 50  $\mu\text{m}$  (B) Immunohistochemical staining using EphB4 antibody (Thermoscientific MA5-15506) on A2780 or A2780-shEphB4 cells with either blocking peptide or IgG primary antibody. Scale bar represents 200  $\mu\text{m}$ . (C) To confirm the clinical relevance of EphB4 expression, we also carried out staining with an alternate antibody (Thermoscientific MA5-15506) in a subset of the ovarian cancer samples (n=105) presented in Figure 6E. Data from this analysis were then plotted using the Kaplan-Meier method. These results were similar the ones in Figure 6E. (D and E) EphB4 or EpoR protein expression is plotted against *EPHB4* or *EPOR* mRNA expression in human epithelial ovarian cancer samples (n=19). (F) Kaplan-Meier curve of disease-specific survival of ovarian cancer patients with low tumoral expression of EpoR, stratified by treatment with ESA. The log-rank test (two-sided) was used to compare differences between groups. (G) Immunohistochemical peroxidase staining of IL6rb in human ovarian and breast cancer samples. Scale bar represents 50  $\mu\text{m}$  (H) Kaplan-Meier curve of disease-specific mortality for ovarian cancer patients stratified by tumoral IL6rb expression. (I) Kaplan-Meier curve of disease-specific mortality of ovarian cancer patients stratified by IL6rb expression ESA treatment. The log-rank test (two-sided) was used to compare differences between groups. (J) Rat brain cortex stained with EphB4 and EpoR antibodies. Scale bar represents 200  $\mu\text{m}$ .

**Table S3, related to Figure 6.** Demographic and clinical characteristics of the cohort of patients with epithelial ovarian cancer; data are presented based on EphB4 and EpoR expression level.

|                      | <b>Low Ephb4</b> | <b>High EphB4</b> | <b>*p</b> | <b>Low EpoR</b> | <b>High EpoR</b> | <b>*p</b> |
|----------------------|------------------|-------------------|-----------|-----------------|------------------|-----------|
| <b>Diagnosis</b>     |                  |                   |           |                 |                  |           |
| Ovarian              | 94 (90.4%)       | 66 (95.7%)        | 0.25      | 32 (88.9%)      | 128 (93.4%)      | 0.47      |
| Peritoneal           | 10 (9.6%)        | 3 (4.4%)          |           | 4 (11.1%)       | 9 (6.6%)         |           |
| <b>Stage</b>         |                  |                   |           |                 |                  |           |
| I                    | 5 (4.7%)         | 1 (1.5%)          | 0.41      | 2 (5.4%)        | 4 (2.9%)         | 0.61      |
| II, III, IV          | 101 (95.3%)      | 68 (98.6%)        |           | 35 (94.6%)      | 134 (97.1%)      |           |
| <b>Grade</b>         |                  |                   |           |                 |                  |           |
| Low                  | 6 (5.7%)         | 10 (14.5%)        | 0.06      | 5 (13.9%)       | 11 (8%)          | 0.33      |
| High                 | 99 (94.3%)       | 59 (85.5%)        |           | 31 (86.1%)      | 127 (92%)        |           |
| <b>Histology</b>     |                  |                   |           |                 |                  |           |
| Serous               | 90 (84.9%)       | 59 (85.5%)        | 1.00      | 31 (83.8%)      | 118 (85.5%)      | 0.80      |
| Other                | 16 (15.1%)       | 10 (14.5%)        |           | 6 (16.2%)       | 20 (14.5%)       |           |
| <b>Ascites</b>       |                  |                   |           |                 |                  |           |
| No                   | 43 (40.6%)       | 28 (44.4%)        | 0.63      | 14 (41.2%)      | 57 (42.2%)       | 1.00      |
| Yes                  | 63 (59.4%)       | 35 (55.6%)        |           | 20 (58.8%)      | 78 (57.8%)       |           |
| <b>Cytoreduction</b> |                  |                   |           |                 |                  |           |
| Suboptimal           | 30 (28.3%)       | 28 (40.1%)        | 0.10      | 13 (35.1%)      | 45 (32.6%)       | 0.85      |
| Optimal              | 76 (71.2%)       | 41 (59.4%)        |           | 24 (64.9%)      | 93 (67.4%)       |           |
| <b>CA125</b>         |                  |                   |           |                 |                  |           |
| Mean (SD)            | 2103 (5825)      | 2364 (5058)       | 0.08      | 1051 (1461)     | 2418 (6047)      | 0.33      |
| <b>Age</b>           |                  |                   |           |                 |                  |           |
| Median (Range)       | 59 (20-92)       | 56 (26-88)        | 0.03*     | 55 (26-88)      | 59 (20-92)       | 0.08      |
| <b>Low EpoR</b>      | 18 (17%)         | 19 (27.5%)        | 0.13      |                 |                  |           |
| <b>High EpoR</b>     | 88 (83%)         | 50 (72.5%)        |           |                 |                  |           |
| <b>Low EphB4</b>     |                  |                   |           | 18 (48.6%)      | 86 (63.8%)       | 0.13      |
| <b>High EphB4</b>    |                  |                   |           | 19 (51.4%)      | 50 (36.2%)       |           |

\*Comparison made with the Fisher's exact test. All p values are two-sided.

**Table S4, related to Figure 6. Summary statistics for disease-specific survival and death in the ovarian cancer cohort.**

Provided as a separate Excel file



**Table S5, related to Figure 6.** Demographic and clinical characteristics of the cohort of patients with breast cancer; data are presented based on EphB4 and EpoR expression level.

|                               | <b>Low EphB4<br/>(n=22)</b> | <b>High EphB4<br/>(n=66)</b> | <b>P</b> | <b>Low EpoR<br/>(n=19)</b> | <b>High EphB4<br/>(n=69)</b> | <b>P</b> |
|-------------------------------|-----------------------------|------------------------------|----------|----------------------------|------------------------------|----------|
| <b>Median Age<br/>(Range)</b> | 54.8 (23.6-73.2)            | 54.3 (14.5-73.8)             | 0.80     | 54.5 (14.5-73.8)           | 54 (14.5-73.8)               | 0.56     |
| <b>Stage</b>                  |                             |                              |          |                            |                              |          |
| I                             | 6 (27.3%)                   | 20 (30.3%)                   | 0.71     | 5 (26.3%)                  | 21 (30.4%)                   | 0.80     |
| II                            | 11 (50%)                    | 27 (40.9%)                   |          | 9 (47.4%)                  | 29 (42.0%)                   |          |
| III                           | 3 (13.6%)                   | 15 (22.7%)                   |          | 3 (15.8%)                  | 15 (21.7%)                   |          |
| IV                            | 2 (9.1%)                    | 4 (6.1%)                     |          | 2 (10.5%)                  | 4 (5.8%)                     |          |
| <b>Low EpoR</b>               | 5 (22.7%)                   | 14 (21.2%)                   | 1.00     |                            |                              |          |
| <b>High EpoR</b>              | 17 (77.3%)                  | 52 (78.8%)                   |          |                            |                              |          |
| <b>Low EphB4</b>              |                             |                              |          | 5 (26.3%)                  | 17 (24.6%)                   | 1.00     |
| <b>High EphB4</b>             |                             |                              |          | 14 (73.7%)                 | 52 (75.4%)                   |          |

**Table S6, related to Figure 6.** Summary statistics for disease-free survival in the breast cancer cohort.

|                                     | <b>Expression</b>    | <b>n</b> | <b># of Events</b> | <b>Median time to event (yrs)</b> | <b>*p</b> |
|-------------------------------------|----------------------|----------|--------------------|-----------------------------------|-----------|
| <b>EphB4</b>                        | Low                  | 22       | 0                  |                                   | <0.01     |
|                                     | High                 | 66       | 25                 | 9.4                               |           |
| <b>EpoR</b>                         | Low                  | 19       | 6                  | 7.2                               | 0.74      |
|                                     | High                 | 69       | 19                 | 10.1                              |           |
| <b>EphB4 and EpoR</b>               | Low EpoR/Low EphB4   | 5        | 0                  |                                   | 0.03      |
|                                     | Low EpoR/High EphB4  | 14       | 6                  | 7.2                               |           |
|                                     | High EpoR/Low EphB4  | 17       | 0                  |                                   |           |
|                                     | High EpoR/High EphB4 | 52       | 19                 | 9.4                               |           |
| <b>Epo treatment (All Patients)</b> | No                   | 56       | 5                  |                                   | <0.001    |
|                                     | Yes                  | 32       | 20                 | 6.2                               |           |
| <b>Epo treatment (High EphB4)</b>   | No                   | 39       | 5                  |                                   | <0.01     |
|                                     | Yes                  | 27       | 20                 | 5.7                               |           |
| <b>Epo treatment (High Epo R)</b>   | No                   | 45       | 4                  |                                   | <0.001    |
|                                     | Yes                  | 24       | 15                 | 6.2                               |           |

\*Comparison made using log-rank statistic

**Table S7, related to Figure 6:** Summary statistics for disease-free survival in the breast cancer cohort by receptor status

|                                      | <b>Expression</b>          | <b>n</b> | <b># of events</b> | <b>Log-rank test</b> | <b>HR (95%CI)</b> | <b>*p</b> |
|--------------------------------------|----------------------------|----------|--------------------|----------------------|-------------------|-----------|
| <b>ER</b>                            | Negative                   | 13       | 4                  | Referent             |                   |           |
|                                      | Positive                   | 23       | 2                  | 0.1286               | 0.29 (0.05-1.60)  | 0.1561    |
| <b>EpoR</b>                          | Low                        | 14       | 3                  | Referent             |                   |           |
|                                      | High                       | 52       | 13                 | 0.6911               | 1.29 (0.37-4.52)  | 0.6935    |
| <b>ER and EpoR</b>                   | ER: Negative, EpoR: Low    | 5        | 1                  | Referent             |                   |           |
|                                      | ER: Negative, EpoR: High   | 8        | 3                  |                      | NE                | NE        |
|                                      | ER: Positive, EpoR: Low    | 2        | 0                  |                      | NE                | NE        |
|                                      | ER: Positive, EpoR: High   | 21       | 2                  | 0.3266               | NE                | NE        |
| <b>Her2</b>                          | Negative                   | 28       | 4                  | Referent             |                   |           |
|                                      | Positive                   | 10       | 2                  | 0.5528               | 1.66 (0.30-9.11)  | 0.5592    |
| <b>Her2 and EpoR</b>                 | Her2: Negative, EpoR: Low  | 5        | 1                  | Referent             |                   |           |
|                                      | Her2: Negative, EpoR: High | 8        | 3                  |                      | NE                | NE        |
|                                      | Her2: Positive, EpoR: Low  | 2        | 0                  |                      | NE                | NE        |
|                                      | Her2: Positive, EpoR: High | 21       | 2                  | 0.3266               | NE                | NE        |
| <b>ESA treatment</b>                 | No                         | 39       | 4                  | Referent             |                   |           |
|                                      | Yes                        | 27       | 12                 | 0.0079               | 4.09 (1.32-12.68) | 0.0148    |
| <b>ESA treatment (negative ER)</b>   | No                         | 10       | 3                  | Referent             |                   |           |
|                                      | Yes                        | 3        | 1                  | 0.9515               | 0.93 (0.10-8.99)  | 0.9515    |
| <b>ESA treatment (positive ER)</b>   | No                         | 17       | 0                  | Referent             |                   |           |
|                                      | Yes                        | 6        | 2                  | 0.0588               | NE                | NE        |
| <b>ESA treatment (negative Her2)</b> | No                         | 22       | 1                  | Referent             |                   |           |
|                                      | Yes                        | 6        | 3                  | 0.0115               | 10.3 (1.07-98.76) | 0.0439    |
| <b>ESA treatment (positive Her2)</b> | No                         | 8        | 2                  | Referent             |                   |           |
|                                      | Yes                        | 2        | 0                  | 0.4315               | NE                | NE        |
| <b>ESA treatment (High EpoR)</b>     | No                         | 32       | 4                  | Referent             |                   |           |
|                                      | Yes                        | 20       | 9                  | 0.0291               | 3.41 (1.05-11.08) | 0.0413    |

\*Comparison made using the Wald Test. All p values are two-sided. NE=numbers not adequate for analysis.

## SUPPLEMENTARY EXPERIMENTAL PROCEDURES

Description of all the materials used in the experiments described below.. All experiments were repeated at least twice.

**Cell lines, maintenance and transfection reagents.** All cell lines were maintained in 5% CO<sub>2</sub>, 95% air at 37°C. Ovarian (HeyA8, SKOV3, A2780, RMG-2) and breast (MDA-MB231, MCF-7) cancer cells were obtained from the ATCC and human leukemic UT-7 cells are from DSMZ (cell line repository in Germany). The ovarian cell lines were maintained in DMEM with 15% heat-inactivated fetal bovine serum (FBS), while breast cell lines were maintained in DMEM with 5% FBS. Culture media was supplemented with 0.1% gentamicin sulfate (Gemini Bioproducts, Calabasas, CA). Cos-1 cells were maintained in 10% DMEM. UT-7 cells were maintained in 10% DMEM and GM-CSF (1ng/ml). All cell lines were routinely tested to confirm the absence of Mycoplasma (Gen-Probe detection kit; Thermo Fisher Scientific), and all *in vitro* experiments were conducted with 60-80% confluent cultures. In the *in vitro* experiments where the rhEpo dosage is not specified, the cell lines were treated with rhEpo 50 IU/ml.

***In vitro* siRNA and shRNA transfections.** All cell lines were transfected with Lipofectamine 2000 reagent (Invitrogen) using either siRNAs or shRNAs (Sigma-Aldrich) as specified in Table S11 according to the manufacturers protocol. Cells were stimulated with rhEpo (50 U/mL) after 48 hours of transfection.

**Real time PCR analysis.** Both cell line and tumor tissue total RNA was extracted using Qiagen RNeasy Kit (Qiagen, Valencia, CA). Using 500 ng of RNA, cDNA was synthesized by using a Verso cDNA kit (Thermo Scientific) as per the manufacturer's instructions. cDNA was subjected to amplification by real-time PCR using specific primer sequences as specified in Table S11. For real-time RT-PCR, we obtained quantitative values (each sample was normalized on the basis of its 18S content), as previously described (Thaker et al., 2006).

**Protein analysis.** For immunoblotting, lysates from cultured cells were prepared using modified RIPA buffer (50 mM Tris-HCl [pH 7.4], 150 mM NaCl, 1% Triton, 0.5% deoxycholate) plus 25 µg/mL leupeptin, 10 µg/mL aprotinin, 2 mM EDTA, and 1 mM sodium orthovanadate. To prepare lysates of snap-frozen tissue from mice, approximately 30-mm<sup>3</sup> cuts of tissue were disrupted with a tissue homogenizer and centrifuged at 13,000 rpm for 30 min within modified RIPA buffer. The protein concentrations were determined using a BCA Protein Assay Reagent kit (Pierce Biotechnology, Rockford, IL). Lysates were loaded and separated on 8% sodium dodecyl sulfate polyacrylamide gels. Proteins were transferred to a nitrocellulose membrane by semi-dry electrophoresis (Bio-Rad Laboratories, Hercules, CA) overnight, blocked with 5% milk for 1 hour and then incubated at 4°C with primary antibody overnight. After washing with TBST, the membranes were incubated with horseradish peroxidase (HRP)-conjugated horse anti-mouse IgG (1:2000, GE Healthcare, UK) for 2 hours. HRP was visualized by use of an enhanced chemi-luminescence detection kit (Pierce). To confirm equal sample loading, the blots were probed with an antibody

specific for beta-Actin (0.1 µg/mL; Sigma). Densitometry was calculated using Image-J software. For immunoprecipitation and co-immunoprecipitation, cells were lysed in non-denaturing NP40 cell lysis buffer. The extracts were incubated (2 h at 4 °C) with A/G-conjugated Ab, and for IP the beads were washed twice with RIPA buffer, once with 0.5 M LiCl in 0.1 M Tris (pH 8.0), and once with PBS. Reactions were boiled in sample buffer, and proteins were then subjected to 10% SDS-PAGE and immunoblotting. Please refer to Table S11 for specific antibodies.

**Cell growth, proliferation, and cell cycle analysis.** Cell growth and proliferation were assessed in triplicates. The time-point for rhEpo treatment (50 IU/mL) was 48 hours after siRNA transfection and incubation was for an additional 24 hours before analysis of cell proliferation. The cells were treated with EphrinB2 (2 ng/µL) for 48 hours to study the effect of EphrinB2 on proliferation. Cell proliferation was assessed with the Edu proliferation assay kit (Click-iT® Edu Alexa Fluor® 488 Flow Cytometry Assay Kit (Invitrogen), as described previously(Thaker et al., 2006). For cell cycle analysis, cells were lifted with Trypsin, washed with PBS and fixed in 70% cold ethanol and stored overnight at -20°C. Cells were then centrifuged (pelleted) at 1,200 rpm for 10 minutes at 4°C. After one wash with PBS cells suspended in propidium iodide (Roche) at 50 µg/mL and RNase A (Qiagen) at 100 µg/mL and incubated in the dark at room temperature. Cells were then assessed for cell cycle phase by a Beckman Coulter XL 4-color flow cytometer. For testing EphB4 expression at different stages of cell cycle, cells were plated at density of  $4 \times 10^6$  in 175 cm<sup>2</sup> plate 1 day before the experiment. Cells were

flow sorted according to cell cycle phases (G1, S and G2) using propidium iodide staining and DNA content analysis.

**ELISA Assays.** Protein levels were quantified by ELISA according to the manufacturer's protocol; please refer to Table S11 for specific ELISA assays. At time of assay, samples were thawed and centrifuged at 14,000 rpm at 4 °C for 5 minutes and then stored on ice. The samples were assayed in triplicate or quadruplicate and data represents the mean concentration.

**Invasion and Migration assays.** Using modified Boyden chambers (Costar, Boston, MA) coated with either defined matrix (invasion) or 0.1% gelatin (migration), Untreated cells ( $7.5 \times 10^4$ ) cells for migration and  $10^4$  for invasion suspended in 100  $\mu$ L serum-free media were added into the upper chamber. Complete media containing 10% FBS (500  $\mu$ L) was added to the bottom chamber as a chemo-attractant. The chambers were incubated at 37°C in 5% CO<sub>2</sub> for either 6 (migration) or 24 (invasion) hours. For siRNA knockdown studies, cells were treated with siRNA 48 hours prior to seeding cells in the Boyden chamber and cells were treated with rhEpo at the time of seeding. The cells were treated with EphrinB2 (2 ng/ $\mu$ L) to study the effect of EphrinB2 on invasion (24 hr) and migration (6 hr). After incubation, the cells in the upper chamber were removed with cotton swabs. Cells were fixed and stained and counted by light microscopy. Cells from 5 random fields were counted. Experiments were done in duplicates and performed three times.





fixed in formalin for paraffin embedding, frozen in optimal cutting temperature (OCT) media to prepare frozen slides, or snap frozen for lysate preparation. Immediately before sacrificing the mice, blood samples were collected under anesthesia by cardiac puncture for standard complete blood count analysis evaluated by MD Anderson Department of Veterinary Medicine and Surgery lab services. For breast cancer models (MCF-7, MDA-MB231) and EphB4 negative ovarian cancer model (RMG2), three times weekly treatments of rhEpo (50 IU) were also started 7 days following injection of tumor cells and continued for the duration of the experiment.

**Nanoparticle preparation and siRNA delivery.** Tumor implantation, siRNA incorporation into DOPC-based nanoliposomes and delivery *in vivo* was carried out as previously described (Ahmed et al., 2010; Landen et al., 2007). DOPC and siRNA were mixed in the presence of excess tertiary butanol at a ratio of 1:10 (w/w) siRNA/DOPC. Tween 20 was added to the mixture in a ratio of 1:19 Tween 20: siRNA/DOPC. The mixture was vortexed, frozen in an acetone/dry ice bath and lyophilized. Before *in vivo* administration, this preparation was hydrated with PBS at room temperature at a concentration of 150  $\mu\text{g}$  siRNA/kg/mouse. Chitosan nanoparticles (CH-NP) were prepared based on ionic gelation of anionic tripolyphosphate and siRNA. Briefly, predetermined tripolyphosphate (0.25% w/v) and siRNA (1  $\mu\text{g}/\mu\text{L}$ ) were added in chitosan solution, and the siRNA/CH-NP were spontaneously formed under constant stirring at room temperature. After incubation at 4°C for 40 minutes, siRNA/CH-NP was collected by centrifugation (Thermo Biofuge, Germany) at 13,000 rpm for 40 minutes at 4°C. The pellet was washed by sterile water three times to isolate siRNA/CH-NP, which

was stored at 4°C until used. For each of these experiments mice (10 mice per group) were randomly divided and treated with siRNA incorporated in neutral nanoliposomes (i.p. administration). For ovarian cancer models, twice weekly treatments started one week after cell injection and continued for approximately 4-6 weeks.

**Construction of the Tissue Microarrays.** Tissue microarray blocks were constructed by taking core samples from morphologically representative areas of paraffin embedded tumor tissues and assembling them on a recipient paraffin block with a precision instrument (Beecher Instruments, Silver Spring, MD) as described previously (Zhang et al., 2012) . The final tissue microarray consisted of 3 blocks with 179 available samples. All samples were spaced 0.5 mm apart. Five-micrometer sections were obtained from the microarray and stained with hematoxylin and eosin to confirm the presence of tumor and to assess tumor histology. Tumor samples were arranged randomly on the blocks. Sample tracking was based on coordinate position for each tissue spot in the tissue microarray block. The spots were transferred onto tissue microarray slides for staining. This sample tracking system was linked to a Microsoft Access database that contained demographic, clinicopathologic, and survival data on the patients who provided the samples, thereby allowing rapid links between histologic data and clinical features. The array was read according to the given tissue microarray map; each core was scored individually. Samples in which no tumor was found or no cores were available were excluded from the final data analysis.

**Immunohistochemical analysis of EphB4, EpoR and IL6rb.** Staining was performed in formalin-fixed, paraffin embedded tumor sections (4  $\mu$ m thickness). After deparaffinization, rehydration and antigen retrieval or fixation, 3% H<sub>2</sub>O<sub>2</sub> was used to block the endogenous peroxidase activity for 10 minutes. Protein blocking of non-specific epitopes was done using either 5% normal horse serum (Epo-R), 5% Bovine Serum Albumin (BSA) in 1x Tris buffered saline with 0.1% Tween 20 (TBST) (EphB4) or 4% fish gelatin in PBS (IL6Rb). Slides were incubated with primary antibody for Epo-R (1:25), EphB4 (1:500) (ab66336 for human tissue; AF446 for rat tissue) or IL6Rb (1:500) overnight at 4 °C. After washing with PBS, the appropriate amount of horseradish peroxidase-conjugated secondary antibody was added and visualized with 3,3'-diaminobenzidine chromogen and counterstained with Gill's hematoxylin #3.

**Transcription factor for analyzing DNA-binding activity of STAT3.** The effect of rhEpo in stimulating STAT3-DNA binding was determined with TransCruz™ oligonucleotide agarose conjugated to the consensus binding site for Stat3 (Santa Cruz Inc., CA)(Yu et al., 1995). Nuclear extracts were made from A2780-shEpoR and A2780-shEphB4 cells that were pre-treated with rhEpo (10 U/mL). The bound STAT3 was separated by NuPAGE (Invitrogen, Carlsbad, CA) and immunoblotted with anti-STAT3 monoclonal antibody (Cell Signaling, MA). Densities of gel bands were determined by ImageJ software. The error-bar stands for the s.e.m. from three individual measurements.

***In silico analysis.*** We reasoned that any novel Epo receptor involved in mediating Epo's neuroprotective effect may also possess the two membrane proximal fibronectin 3 (FN3) domains (as found in EpoR). This fact is consistent with the domain architecture of many other hematopoietic cytokine binding proteins. Such conserved domain architecture is also compatible with both a heterodimeric complex containing EpoR and/or an independent homodimeric receptor. We thus extracted all proteins containing two membrane proximal FN3 domains from the human proteome (64 in all) and asked whether there was any evidence for their role in response to low oxygen conditions/ischemia. This regulatory aspect was analyzed because of the EpoR-independent tissue protective effects of Epo mutants. The latter analysis was performed using a text-mining approach that encompasses the use of comprehensive protein synonyms, and concepts such as hypoxia and ischemia. Of the 64 proteins containing the 2FN3-TM domain composition, only five showed evidence for mediating response to low oxygen conditions: *EPHB4*, *IL6RB*, *TIE1* and *TF* and *GHR*. Next, we asked which of these proteins had a reported role in Angiogenesis and/or erythropoiesis. These analyses were performed using a simple PUBMED query "Protein\_name AND (Angiogenesis OR Erythropoiesis)". Only *EPHB4* and *IL6RB* possessed at least some evidence of involvement in both biological processes. Interestingly, *IL6RB* was considered a positive internal control in this process as it had already been reported that it may be involved in mediating Epo's tissue protective functions.

Interestingly, direct examination of the *EPHB4* locus revealed that it directly juxtaposes the Epo locus, albeit on the opposite strand. This close genomic association was conserved in all vertebrate genomes examined. Also interesting was the realization that

*EPHB3* directly juxtaposes *THPO*, an association that is also conserved amongst species. Moreover, such genomic co-localization of functionally associated molecules is seen for other receptor:ligand partners (e.g. MST1 and its receptor MST1R: see [http://www.ensembl.org/Homo\\_sapiens/contigview?gene=OTTHUMG00000136237;db=vega](http://www.ensembl.org/Homo_sapiens/contigview?gene=OTTHUMG00000136237;db=vega)).

## List of peptides used in competitive binding assays

| Description | Localization | Sequence            | Competitive Inhibition |
|-------------|--------------|---------------------|------------------------|
| TKL         | 23-41        | TKLETADLKWVTFPQVDGQ | -                      |
| EEL         | 43-58        | EELSGLDEEQHSVRTY    | +                      |
| VQR         | 63-71        | VQRAPGOAH           | -                      |
| WVP         | 77-87        | WVPRRGAVHVY         | -                      |
| CLS         | 97-107       | CLSLPRAGRSC         | -                      |
| DAD         | 119-136      | DADTATALTPAWMENPY   | -                      |
| LRL         | 164-174      | LRLGPLSKAGF         | -                      |
| VPA         | 228-239      | VPAPGPSPSLYC        | -                      |
| EDG         | 241-252      | EDGQWAEQPVTG        | -                      |
| APG         | 256-267      | APGFEEAEGNTK        | -                      |
| FKP         | 267-287      | FKPLSGEGSCQP        | -                      |
| REC         | 362-373      | RECRPGGSCAPC        | -                      |
| DPG         | 380-389      | DPGPRDLVEP          | -                      |
| LNG         | 409-421      | LNGVSSLATGPVP       | -                      |
| EKG         | 473-483      | EKGAEGPSSVR         | -                      |
| RGL         | 496-505      | RGLKRGASYLV         | -                      |
| NCQ         | Adam 15-EM   |                     | -                      |
| PPR         | Epo 28-43    |                     | -                      |

## Detailed description of reagents used in this study

### a. Antibodies

| Antibody          | Application | Vendor/Cat.No.                                                                                    |
|-------------------|-------------|---------------------------------------------------------------------------------------------------|
| Epo               | WB          | R&D Systems (MAB2871)                                                                             |
| EphB4             | WB, IP, IHC | Invitrogen (37-1800)<br>AbCam (ab66336)<br>Thermoscientific (MA5-15506)<br>R&D Biosystems (AF446) |
| EphB2             | WB          | AbCam (ab5418)                                                                                    |
| p-Tyr             | WB          | Invitrogen                                                                                        |
| EpoR              | WB          | Santa Cruz (sc-697)                                                                               |
| Jak-2             | WB          | Cell Signaling (3230)                                                                             |
| pJak-2            | WB          | Cell Signaling (3771)                                                                             |
| STAT3             | WB          | Cell Signaling (4904)                                                                             |
| pSTAT3            | WB          | Cell Signaling (9145)                                                                             |
| STAT5             | WB          | Cell Signaling (9363)                                                                             |
| pSTAT5            | WB          | Cell Signaling (4322)                                                                             |
| Src               | WB          | Cell Signaling (2108)                                                                             |
| EpoR-biotinylated | IHC         | R&D Systems (BAF1390)                                                                             |
| IL6Rb             | IHC         | AbCam (ab170257)                                                                                  |

### b. Assay Kits

| Description     | Species | Vendor/Ca.No.             |
|-----------------|---------|---------------------------|
| Serum Epo ELISA | Human   | R & D Systems/DEP00       |
| Serum Epo ELISA | Mouse   | R & D Systems/MEP00       |
| pSTAT3 ELISA    | Human   | R & D Systems/KCB4607     |
| pJak-2 ELISA    | Human   | Life Technologies/KHO5621 |
| pSTAT5 ELISA    | Human   | R & D Systems/KCB4190     |

### c. siRNA

| Vendor                | Sequence (5'-3')                |
|-----------------------|---------------------------------|
| Control sense         | UUCUCCGAACGUGUCACGU<br>[dT][dT] |
| Control antisense     | ACGUGACACGUUCGGAGAA [dT][dT]    |
| EpoR sense            | GAUGAUCAGGGAUCCAAUA [dT][dT]    |
| EpoR antisense        | UAUUGGAUCCCUGAUCAUC [dT][dT]    |
| EphB4 seq #1 sense    | GAUCUGAAGUGGGUGACAU<br>[dT][dT] |
| EphB4 seq #1antisense | AUGUCACCCACUUCAGAUC [dT][dT]    |
| EphB4 seq #2 sense    | CCCAUUUGAGCCUGUCAAU [dT][dT]    |
| EphB4 seq #2antisense | AUUGACAGGCUCAAAUGGG [dT][dT]    |
| EphB4 seq #3 sense    | GAUCUGAAGUGGGUGACAU<br>[dT][dT] |
| EphB4 seq #3antisense | AUGUCACCCACUUCAGAUC [dT][dT]    |
| Src sense #1          | GGCUGAGGAGUGGUUUUU[dT][dT]      |
| Src antisense #1      | AAAAUACCACUCCUCAGCC[dT][dT]     |
| Src sense #2          | GCGAACCACCUGAACAAAtt[dT] [dT]   |
| Src antisense #2      | UUGUUCAGGUGGUUCGCcc[dT] [dT]    |
| STAT3 sense #1        | GCCUCUCUGCAGAAUUCAA[dT][dT]     |
| STAT3 antisense #1    | UUGAAUUCUGCAGAGAGGC[dT][dT]     |
| STAT3 sense #2        | GGUAACGUCAUAGCAGA[dT] [dT]      |
| STAT3 antisense #2    | UCUGCUAAUGACGUUAUCC[dT] [dT]    |

### d. shRNA

|           | Sequence                                                       |
|-----------|----------------------------------------------------------------|
| EpoR #1   | CCGGCACCTAAAGTACCTGTACCTTCTCGAGAAGGTAC<br>AGGTACTTTAGGTGTTTTTG |
| EpoR #2   | CCGGGATGATCAGGGATCCAATATGCTCGAGCATATT<br>GGATCCCTGATCATCTTTTTG |
| EphB 4 #1 | CCGGCTGGAGTTACGGGATTGTGATCTCGAGATCACA<br>ATCCCGTAACTCCAGTTTTT  |
| Ephb 4 #2 | CCGGCACCACTCAATCATTCTCGAGAAATGAT<br>TGAGTTTGGTGGTGTTTTTG       |



**e. Primers**

| <b>Oligo Name</b>  | <b>Sequence 5'-3'</b>                                  |
|--------------------|--------------------------------------------------------|
| humEphB4 for       | CGGCAGCCTCACTACTCAG                                    |
| humEphB4 rev       | TCCCATTTTGGATGGCCCGAAG                                 |
| humEpoR for        | GATACCTATCTGGTGCTGGA                                   |
| humEpoR rev        | CTGTTCTCATAAGGGTTGGA                                   |
| Mutated EphB4 for  | CCTGCCAGCCATGCCCGCGAACAGTCATT<br>CTAACACCATTGGATCAG    |
| Mutated EphB4 rev  | CTGATCCAATGGTGTTAGAATGACTGTTTCGC<br>GGGGCATGGGCTGGCAGG |
| $\beta$ -Actin for | ATCTGGCACCACACCTTCTACAATGAGCTGC<br>G                   |
| $\beta$ -Actin rev | CGTCATACTCCTGCTTGCTGATCCACATCTG<br>C                   |
| STAT3 for          | CTTCATTTCCCGTAAATCCCTAAAGCT                            |
| STAT3 rev          | AGCTTTAGGGATTTACGGGAAATGA                              |

**f. cDNA**

| <b>Name</b>  | <b>Vendor</b> | <b>Catalog No.</b> |
|--------------|---------------|--------------------|
| EphB4        | Origene       | RG208559           |
| EpoR         | Origene       | RG211341           |
| Empty vector | Origene       | PS100010           |

**g. Chemicals**

| <b>Name</b>           | <b>Application</b>          | <b>Vendor/Cat.No.</b>             |
|-----------------------|-----------------------------|-----------------------------------|
| Soluble EphB4         | Binding assay               | R&D (10235-HCCH-200)              |
| Soluble EphrinB2      | Binding assay               | Sino Biologicals (10881-HCCH-100) |
| Recombinant Epo       | Binding assay               | Genway                            |
| Procrit               | <i>In vitro and in vivo</i> | Amgen                             |
| I <sup>125</sup> -Epo | Binding assay               | PerkinElmer                       |
| IL3                   | Binding assay               | R&D (203-IL-050)                  |
| CXCL12                | Binding assay               | R&D (644-SD-025/CF)               |
| PP2                   | <i>In vitro</i>             | Sigma Aldrich                     |
| EPO/Fc                | Binding assay               | Cell sciences (CRE600C)           |
| EPO/Fc                | Binding assay               | Cell sciences (CRE600B)           |
| EPO-alpha/Fc          | Binding assay               | Cell sciences (CSI20107B)         |
| EPO-beta/Fc           | Binding assay               | Cell sciences (CRE130A)           |
| EPHB4/Fc              | Binding assay               | Biomiga (EB1004-200)              |
| EFNB2 / Fc            | Binding assay               | Sino Biological Inc. (10881-H03H) |
| soluble EpoR          | Binding assay               | R&D (307-ER/CF)                   |
| EpoR/Fc               | Binding assay               | R&D (963-ER)                      |

**h. Agarose-beads conjugated STAT3 consensus oligos**

| <b>Name</b>                                                                          | <b>Vendor</b> |
|--------------------------------------------------------------------------------------|---------------|
| 5'— GAT CCT TCT GGG AAT TCC TAG ATC — 3'<br>3'— CTA GGA AGA CCC TTA AGG ATC TAG — 5' | Santa Cruz    |

## SUPPLEMENTARY REFERENCES:

Ahmed, A. A., Lu, Z., Jennings, N. B., Etemadmoghadam, D., Capalbo, L., Jacamo, R. O., Barbosa-Morais, N., Le, X. F., Vivas-Mejia, P., Lopez-Berestein, G., *et al.* (2010). SIK2 is a centrosome kinase required for bipolar mitotic spindle formation that provides a potential target for therapy in ovarian cancer. *Cancer cell* 18, 109-121.

Landen, C. N., Jr., Lin, Y. G., Armaiz Pena, G. N., Das, P. D., Arevalo, J. M., Kamat, A. A., Han, L. Y., Jennings, N. B., Spannuth, W. A., Thaker, P. H., *et al.* (2007). Neuroendocrine modulation of signal transducer and activator of transcription-3 in ovarian cancer. *Cancer Res* 67, 10389-10396.

Larkin, M. A., Blackshields, G., Brown, N. P., Chenna, R., McGettigan, P. A., McWilliam, H., Valentin, F., Wallace, I. M., Wilm, A., Lopez, R., *et al.* (2007). Clustal W and Clustal X version 2.0. *Bioinformatics* 23, 2947-2948.

Thaker, P. H., Han, L. Y., Kamat, A. A., Arevalo, J. M., Takahashi, R., Lu, C., Jennings, N. B., Armaiz-Pena, G., Bankson, J. A., Ravoori, M., *et al.* (2006). Chronic stress promotes tumor growth and angiogenesis in a mouse model of ovarian carcinoma. *Nat Med* 12, 939-944.

Yu, C. L., Meyer, D. J., Campbell, G. S., Lerner, A. C., Carter-Su, C., Schwartz, J., and Jove, R. (1995). Enhanced DNA-binding activity of a Stat3-related protein in cells transformed by the Src oncoprotein. *Science* 269, 81-83.

Zhang, J., Guo, X., Chang, D. Y., Rosen, D. G., Mercado-Urbe, I., and Liu, J. (2012). CD133 expression associated with poor prognosis in ovarian cancer. *Mod Pathol* 25, 456-464.
